1 **Identification and characterization of novel infection associated transcripts in**  
2 **macrophages**

3 **Prabhakar A<sup>1,2</sup>, Mohit Singla<sup>3</sup>, Rakesh Lodha<sup>3</sup>, Vivek Rao<sup>1,2\*</sup>**

4 <sup>1</sup>Academy of Scientific and Innovative Research (AcSIR), Ghaziabad, 201002, India

5 <sup>2</sup> CSIR Institute of Genomics and Integrative Biology (CSIR-IGIB), South Campus, New Delhi,  
6 India

7 <sup>3</sup>Department of Pediatrics, All India Institute of Medical Sciences (AIIMS), New Delhi, India

8 \*Address for correspondence: Vivek Rao ([vivek.rao@igib.res.in](mailto:vivek.rao@igib.res.in))

9 Running title: Novel TLR4 and infection induced non coding transcript

10 Key words: Non coding transcript, TLR4, bacterial infection, THP1

11 **ABSTRACT:**

---

12 Regulated expression of genes in response to internal and external stimuli is primarily responsible  
13 for the enormous plasticity and robustness of biological systems. Recent studies have elucidated  
14 complex regulatory non protein coding transcript (lncRNA) circuits in coordinated response of  
15 immune cells. By analysis of lncRNA expression profiles of macrophages in response to Mtb  
16 infection, we identified novel highly expressed transcripts, unique in encompassing one functional  
17 protein coding transcript- CMPK2 and a previously identified type I IFN responsive lncRNA- NRIR.  
18 While these RNA are induced by virulent Mtb early, the complete absence of expression in non-  
19 viable Mtb infected cells coupled to a more protracted expression profile in the case of BCG  
20 suggest an important role in macrophage response to mycobacteria. Moreover, enhanced  
21 expression was observed in macrophages from TB patients. The elevated expression by 1h in  
22 response to fast growing bacteria further emphasizes the importance of these RNAs in the  
23 macrophage infection response. These transcripts (TILT1, 2,3 - TLR4 and Infection induced Long  
24 Transcript) are triggered exclusively by TLR4 stimulation (LPS) with faster and stronger kinetics

25 in comparison to the lncRNA – NRIR. Overall, we provide evidence for the presence of numerous  
26 transcripts that is a part of the early infection response program of macrophages.

27 Abbreviations: IFN- Interferon, NRIR, CMPK2

## 28 **Introduction:**

29 Intracellular bacteria encounter diverse host derived stresses and adapt to a wide ranging yet cell/  
30 tissue specific niche(Huang and Brumell 2014; Hardison et al. 2018). Modulating the host to  
31 subdue these potentially harmful responses is one of the strategies employed by pathogens for  
32 long term infection (Cameron et al. 2015; Passalacqua et al. 2016). This plasticity requires an  
33 enormous degree of flexibility in the pathogen's ability to not only sense the stimuli but fine tune  
34 host transcriptional programs to suit survival inside the cells (Jimenez et al. 2016; Cornejo et al.  
35 2017; Eisenreich et al. 2017). It is not surprising that gene expression patterns at the onset of  
36 infection, immediate to the initial contact with host cells, often determine the outcome and overall  
37 pathogenesis of the organism.

38 Over several years, a detailed coverage of expression has helped identify protein coding patterns  
39 in diverse pathogens and cells/ intracellular niches in addition to paving the way for deciphering  
40 the regulatory circuits of non-protein coding transcripts(Winchell et al. 2016; Hayward et al. 2018).  
41 Recent evidences have delineated a definitive role for the long non-coding RNAs (lncRNA) in  
42 orchestrating the immune response by regulating gene expression is now being recognized  
43 (Imamura and Akimitsu 2014; Yu et al. 2015; Spurlock et al. 2016; Atianand et al. 2017). These  
44 RNAs have been implicated in the regulation of several cellular processes, immune cell functions  
45 and response to infections (Ouyang et al. 2014; Wang et al. 2014; Sigdel et al. 2015; Wang et al.  
46 2015; Carpenter and Fitzgerald 2018; Xie et al. 2019; Menon and Hua 2020; Robinson et al.  
47 2020). Non coding response dynamics have helped uncover novel facets of host – pathogen  
48 interactions in several bacterial pathogens (Gomez et al. 2013; Wang et al. 2015; Roy et al. 2018;

49 Yan et al. 2018). Not surprisingly, Mtb infection of macrophages induces several of the non-coding  
50 transcripts with functional relevance in activating innate immune functions as well as modulation  
51 of these responses by the pathogen (Yang et al. 2016; Huang et al. 2018; Sharbati et al. 2019).  
52 Clinically relevant lncRNAs have recently been identified as putative biomarkers for TB patients  
53 (Chen et al. 2017; Li et al. 2017; Wu et al. 2020). With phagocytes initiating a strong innate  
54 immune response on primary contact with invading pathogens, it is logical to assume that  
55 activation of surface TLRs would be one of the initial signals for expression of gene regulatory  
56 networks in these cells. Recent advances in high throughput deep sequencing has revealed the  
57 identity of novel transcripts that arise either out of novel ORFs, trans-splicing events, long  
58 extensions and degradation products of previously identified transcripts (Srikumar et al. 2015;  
59 Kalam et al. 2017; Jackson et al. 2018; Agirre et al. 2019). In our attempt to study the role of type  
60 I IFN response in macrophages, we discovered that NRIR, previously identified as a lncRNA  
61 regulating this pathway was one of the highest expressed non coding transcript in Mtb infected  
62 macrophages. While the origins of these RNA is not yet clearly defined, detailed evaluation of this  
63 genomic locus indicated the presence of multiple transcripts. In line with this, we identified 3 other  
64 transcripts that appear to be encompassing NRIR and the neighboring IFN inducible gene –  
65 CMPK2. We demonstrate that these transcripts- TILT 1,2,3 are induced in response to bacterial  
66 infection temporally and is specific to activation of TLR4 by LPS. Expression of TILT is induced  
67 significantly in patients with active TB. Early expression following stimulation of macrophages  
68 suggests an important role for this transcript in the rapid response program of cells.

## 69 **Results:**

### 70 **The lncRNA NRIR is induced strongly in response to Mtb infection in macrophages:**

71 The response of macrophages to mycobacterial infection is characterized by an elaborate  
72 expression of genes that include protein coding and non-coding transcripts. The type I IFN  
73 signaling pathway is one of the early and robust response of host macrophage to mycobacterial

74 infection (Novikov et al. 2011; Desvignes et al. 2012). Previous studies have identified the lncRNA  
75 NRIR as a primary lncRNA regulating this response in infected cells (Kambara et al. 2014). We  
76 hypothesized that NRIR, given the strong type I IFN signaling induced, would also be a crucial  
77 component of the host response to Mtb in macrophages. In line with our surmise, NRIR showed  
78 the highest expression levels in Mtb infected macrophages amongst a few of the well annotated  
79 mammalian lncRNAs (Fig. 1A). While NRIR was expressed 6h post infection with a steady  
80 increase in levels at later time points, the other innate response regulating lncRNA-NEAT1, was  
81 more protracted and was expressed at ~3x higher by 24h of infection (Fig. 1B). In fact, NRIR  
82 showed a steady rise in expression from the ~4x by 6h to a sharp increase by 24h of infection in  
83 excess of 200 times the values in uninfected samples (Fig.1C). In response to a non-pathogenic  
84 vaccine strain, BCG, NRIR was only induced by the later time point (24h) in infection, albeit at a  
85 lower magnitude than Mtb infection (Fig. 1D). Interestingly, the response was completely  
86 abrogated in macrophages exposed to heat killed Mtb even by 24h implicating an active infection  
87 mediated induction of these non-coding transcripts in macrophages. The kinetic response of NRIR  
88 induction observed in *S. typhimurium* and *E. coli* infections further validated the importance of  
89 these transcripts in infection response of human macrophage. NRIR was visible by the 1<sup>st</sup> h of  
90 infection followed by a steady increase of expression by 6h of infection in macrophages infected  
91 by either strain of bacteria (Fig. 1E).

92

93

94

95

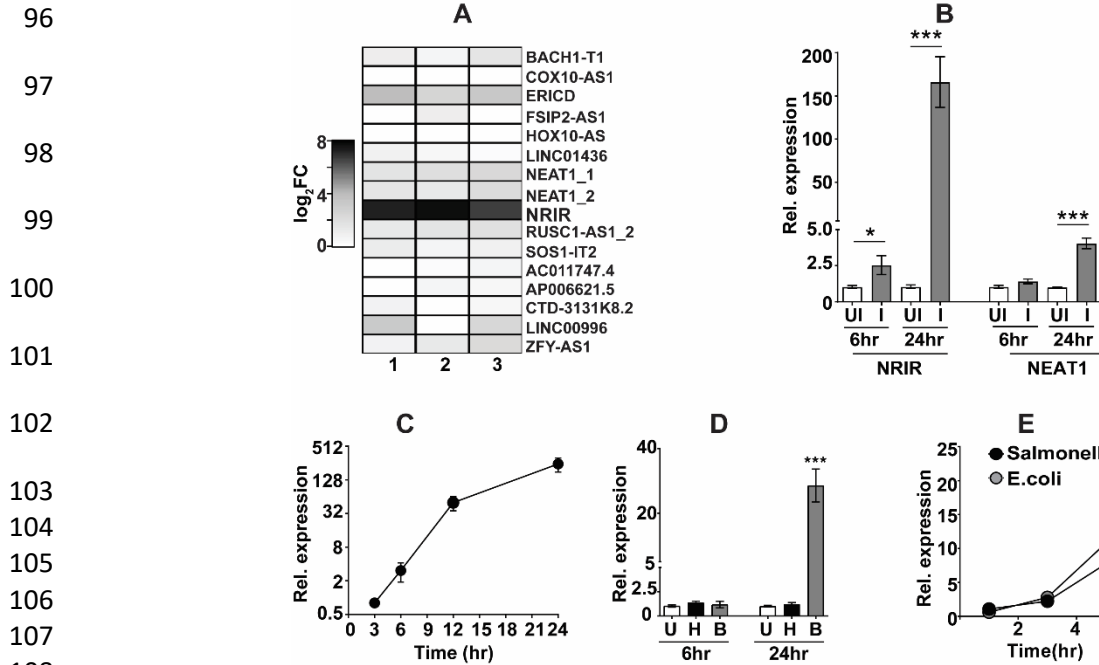

**Figure 1: NRIR is expressed in response to bacterial infection.**

(A) The expression levels of a few of the annotated non-coding transcripts was analysed by qRT PCR in THP1 macrophages infected with Mtb. Change in expression of triplicate assays relative to GAPDH ( $\log_2FC$ ) is depicted as a heat map. Three independent replicate experiments are individually represented as mean expression values from triplicate assays (n=3).

B-E) Expression of NRIR (B-E) and Neat1 (B) in macrophages infected with Mtb (B-D) or *E. coli* or *S. typhimurium* (E) at different time intervals was analysed by qPCR. Change in expression of triplicate assays relative to GAPDH ( $\logFC$ ) is represented as rel. expression from triplicate assays of 2-3 independent replicate experiments. U- uninfected, H- Heat killed Mtb, B- *M.bovis* BCG.

**The NRIR locus supports transcription of several other non-coding transcripts.** NRIR is localized in the same genomic loci with the mitochondria associated gene – CMPK2 (Fig. 2A). While NRIR is the most abundant lncRNA, there have been reports of the presence of other non-

125 coding transcripts in this locus ((Lagarde et al. 2017), Fig.2A). To evaluate other infection specific  
 126 transcripts, we used a PCR strategy with primers mapping to the NRIR/ CMPK2 specific region  
 127 (P1 and P4) and observed three distinct amplicons of ~400bp, 800bp and 1kb which were absent  
 128 when genomic DNA was used as a template (Fig. 2B). Both NRIR and CMPK2 specific amplicons  
 129 were observed in reactions with the larger 2 fragments as template (Fig. 2C). Moreover, while the  
 130 800bp fragment produced the 400bp and 800bp amplicons, the largest 1kb fragment again  
 131 yielded all 3 fragments on amplification with primers-1 and 4. Sequencing of the amplicons  
 132 revealed the presence of 3 unique splice variants with fusion of Exon 4 of CMPK2-203 and the  
 133 first exon of NRIR-202 (Fig. 2D). We then analyzed expression in total blood RNA of healthy  
 134 individuals. As seen in THP1 cells, amplicons of ~800bp and 1kb in PCR with specific primers 1  
 135 and 4 were observed confirming the universal presence of these transcripts (Fig. 2E).

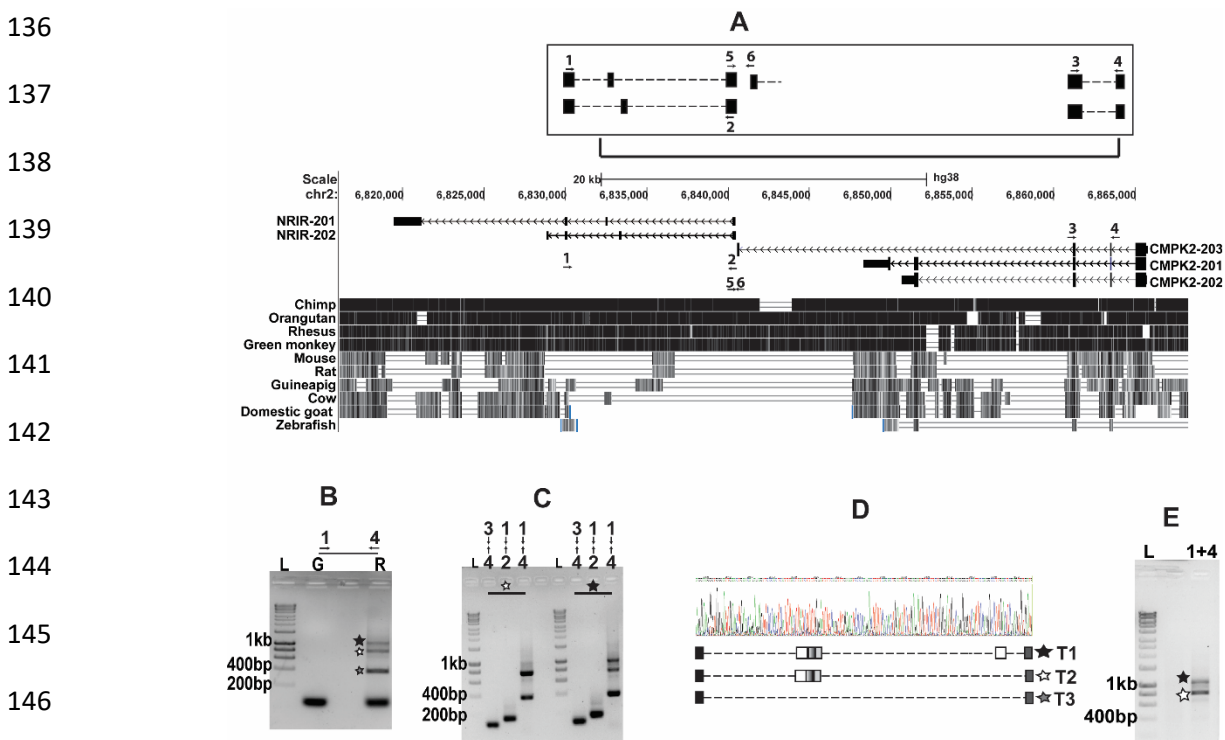

Fig. 2

149 **Fig. 2. Identification of the novel transcripts-TILT encompassing CMPK2 and another**  
 150 **lncRNA – NRIR in Mtb infected macrophages.**

151 A- The genomic locus of CMPK2 and NRIR in human cells is depicted with the previously  
152 annotated transcripts. The primers used for PCR analysis of transcripts are depicted by  
153 numbers.

154 B, E- Analysis of the PCR amplification of cDNA (B, 24h) by using primers (1,4) from THP1  
155 cells infected with Mtb as indicated to regions as depicted in panel A of the genomic locus by  
156 agarose gel electrophoresis. C- Amplification of the PCR product of reaction in B with primers  
157 as indicated in the figure. D- The profiles of exons present in the 3 new non-coding transcripts  
158 identified by sequencing of the PCR products. E- Expression of the novel transcripts in total  
159 blood of a healthy individual analysed by agarose gel electrophoresis.

160 **The novel transcripts are actively induced in response to bacterial infection of**  
161 **macrophages**

162 Macrophages are typically designed to respond to assorted stimuli and alter their transcriptional  
163 profile to suit the incoming insult. Being a critical component of the host innate defense,  
164 macrophages are fine tuned for a rapid response to infections. TILT, in contrast to NRIR was  
165 more protracted and reduced- expression in macrophages was seen only by 12h of infection  
166 (4fold) with Mtb with a further increase to 14-fold by 24h (14-fold) (Fig. 3A). The absence of TILT  
167 expression in macrophages infected with heat inactivated Mtb even by 24h argued for the  
168 importance of active infection in the expression of TILT. Moreover, delayed expression of these  
169 RNAs only by 24h in response to infection by a non-pathogenic slow growing mycobacterial strain-  
170 *M. bovis* BCG further corroborated the importance in the response to pathogenic infection (inset).  
171 Clinical relevance in infection was highlighted by the significantly enhanced expression in the  
172 blood of active TB patients in comparison to healthy individuals (Fig. 3B). A similar profile of  
173 enhanced expression of TILT was observed for infection with Salmonella and *E. coli* (Fig. 3D),  
174 expression levels of TILT showed a strong peak (~25-40 fold) by 3h of infection followed by a

175 rapid decline to around 10- fold greater than basal levels by 6h of infection associated with the  
176 faster growth rate of these bacteria in comparison slow growing mycobacteria.

177

178

179

180

181

182

183

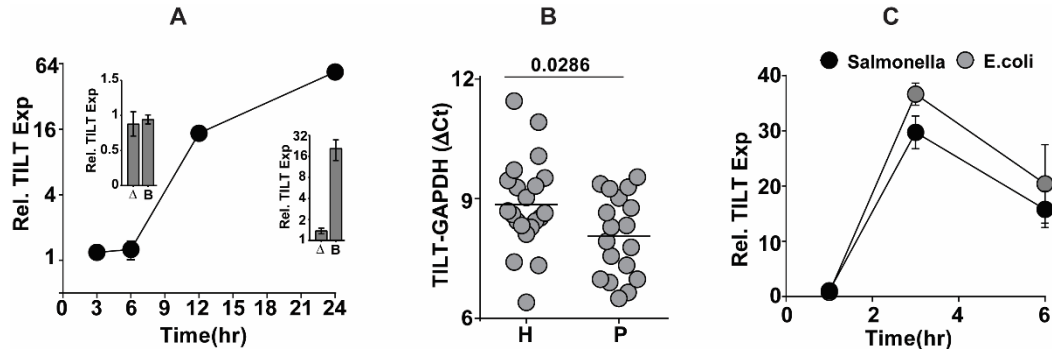

184 **Fig. 3.**

Fig. 3

### 185 **LncRNA- TILT is actively induced in Mtb infected macrophages**

186 A-C, Expression kinetics of TILT in macrophages infected with Mtb at a MOI of 5. At the indicated  
187 intervals, RNA prepared from cells was used for analysis by qRT PCR. A- RNA from THP1 cells  
188 Inset- at 6 and 24h of infection with Heat killed Mtb (Δ) or BCG. B- from blood of healthy individuals  
189 and TB patients; each symbol represents one individual. C- in THP1 macrophages infected with  
190 *E. coli*, *S. typhimurium* at a MOI of 5 for the indicated time intervals. Values represented are mean  
191 + SEM of triplicate wells of 2-3 independent experiments.

### 192 **TLR4 signaling acts as the primary stimulus for TILT expression in macrophages**

193 Macrophages, being the primary responders to any infection, are endowed with the capacity to  
194 recognize microbial PAMPS via innate receptors like TLRs and activate signaling mechanisms  
195 for rapid and robust neutralization of the pathogen. To identify the stimulus involved in activating  
196 this lncRNA, we analyzed TILT expression in macrophages stimulated with different TLR ligands  
197 (Fig. 4A). Where stimulation of most TLRs resulted in minimal induction, only LPS actively  
198 enhanced TILT expression in THP1 cells by ~ 20-fold increase by 6h and a sharp decline to ~9  
199 fold by 24h. In response to LPS, the two transcripts- NRIR and TILT showed distinct kinetics of  
200 expression. Contrasting with the Mtb induced profile of faster NRIR expression, TILT was strongly



201 induced as early as 3h (~16 fold) reaching to an excess of 200 times the basal levels by the 6<sup>th</sup>  
 202 hour of LPS stimulation and stabilizing thereafter to nearly 100 folds by 48h. In contrast, NRIR,  
 203 despite any detectable expression by 3h, amplified rapidly to reach ~50 times basal levels with a  
 204 peak of ~150 fold at 24h and then stabilizing to ~60 fold by 48h of stimulation (Fig. 4B). A complete  
 205 dependence on TLR4 signaling was observed for expression of TILT in macrophages- treatment  
 206 with the TLR4 antagonist -CLI095 completely neutralized TILT expression in macrophages in  
 207 response to LPS, *E. coli* and *S. typhimurium*. In contrast, the effect of CLI0095 was only partial in  
 208 THP1 infected with *Mtb* suggesting a TLR4 independent accessory signaling for TLT expression  
 209 (Fig. 4C).

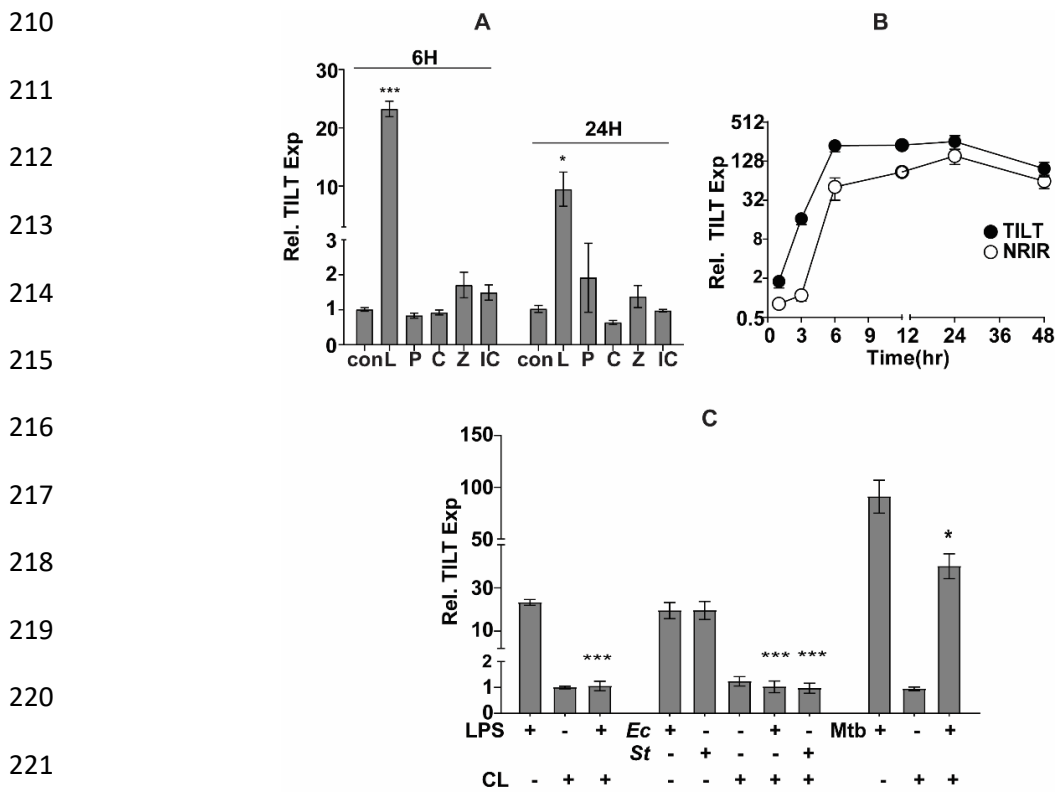

Fig. 4

**TILT is induced temporally in response to LPS stimulation in THP1 macrophages.**

224 A- TILT expression in macrophages stimulated with different TLR ligands- L- LPS at 10 ng/ml,  
 225 P- Peptidoglycan at 20 ng/ml, C- Pam3CSK at 20 ng/ml, Z-Zymosan at 10 µg/ml, IC- poly  
 226 IC at 2 µg/ml ) at 6 and 24h post stimulation. B) Kinetics of TILT and NRIR expression in

227 macrophages treated with 10ng/ml of LPS. C) TILT expression in macrophages infected  
228 with *S. typhi* (3h *p.i.*), *E. coli* (3h *p.i.*), *Mtb* (24h *p.i.*) or stimulated with LPS (6h *p.s.*) in the  
229 presence of the TLR4 inhibitor CLI095 (3  $\mu$ M). At the indicated intervals RNA prepared  
230 from cells was used for analysis by qRT PCR and normalized to GAPDH. Relative  
231 expression at any given time w.r.t unstimulated is depicted as mean  $\pm$  SEM for triplicate  
232 assays of 2-3 independent experiments.

233

## 234 **DISCUSSION**

235 Macrophages have been shown to successfully respond to numerous stimuli including infections  
236 and initiate response profiles for control of the pathogen (Weiss and Schaible 2015). Over several  
237 decades of research, the landscape of stimuli driven protein coding expression patterns have  
238 been realized in high detail (Roy et al. 2018). It is now possible to portray the layout of protein/  
239 pathway induction profiles in host macrophages as a response to infection with several bacterial  
240 pathogens (Denzer et al. 2020). The discovery of several non-protein coding transcripts as key  
241 regulators has only supplemented another layer to the multi-scale pyramid of the macrophage  
242 response kinetics (Aune and Spurlock 2016; Duval et al. 2017; Zur Bruegge et al. 2017; Ma et al.  
243 2019; Ahmad et al. 2020). In the last few years, several non-coding transcripts and regulatory  
244 networks have been identified with important regulatory roles in infection with the help of powerful  
245 omics-untargeted / specific-targeted approaches (Moon et al. 2014; Liu et al. 2018; Menard et al.  
246 2018; Fan et al. 2019; Liu et al. 2019).

247 By using simple molecular techniques, we have identified novel non coding transcripts (TILT1-3)  
248 encompassing a previously identified lncRNA (NRIR) and a mitochondrial resident gene  
249 (CMPK2). Recently, by using high throughput Capture Long Seq (CLS), GENCODE consortium  
250 have re annotated lncRNAs population in human and mouse tissues identifying several noncoding  
251 transcripts (Lagarde, 2017 #77). We demonstrate the presence of multiple transcripts comprising  
252 of different exons from the NRIR and CMPK2 genomic locus implying a higher degree of splicing

253 based regulation of gene expression in this region. Our finding of TILT in human blood cells of a  
254 normal individual also argues for the presence of these transcripts in myeloid cell populations.  
255 Surprisingly, this arrangement of NRIR with CMPK2 is only observed in human cells and is absent  
256 from murine cells suggestive of a unique regulatory network to fine tune macrophage response  
257 kinetics (Breschi et al. 2017).

258 Despite a differential amplitude and kinetics of expression of the two non-coding transcripts (NRIR  
259 and TILT) in response to different stimuli, the rapid and sustained levels of expression over 24-  
260 48h of stimulus highlights the importance of this locus in the response kinetics of macrophages.  
261 Increased expression of TILT in sera of active TB patients only signifies the importance of this  
262 response in TB infections, coupled to the enhanced expression of TILT in response to infection  
263 with *E. coli* and Salmonella argues for an important regulatory circuit in macrophage response to  
264 infection. Further the strong induction of TILT with LPS stimulation earlier than the expression of  
265 NRIR is suggestive of a differential control of expression. While we did not find promoter like  
266 element different from the annotated promoter of CMPK2 (Data not shown), separate promoter  
267 like elements were observed upstream of NRIR indicative of an uncoupled expression of this  
268 lncRNA from CMPK2 and TILT. Abrogation of TILT expression following treatment with CLI095 in  
269 LPS stimulated, in *E. coli*, Salmonella infections only substantiates the absolute requirement of  
270 TLR4 mediated signaling for TILT expression in macrophages.

271 In sharp contrast to NRIR, expression of TILT was more protracted and reduced in comparison in  
272 response to Mtb infection. Moreover, treatment of Mtb infected cells with CLI095 only partially  
273 reduced the expression of TILT in macrophages. It is well established that macrophage response  
274 to Mtb is not primarily dependent on TLR4 signaling with combinatorial requirement for other TLR  
275 (TLR2), NLR, RLR mediated signaling rather than predominant signaling axis (Kleinnijenhuis et  
276 al. 2011; Faridgozar and Nikoueinejad 2017). In fact, mice lacking multiple TLR did not suffer  
277 from increased susceptibility to Mtb infection (Nguyen et al. 2020) again corroborating the multiple  
278 axis of macrophage stimulation by Mtb leading to the enormous redundancy and plasticity of the

279 macrophage responses. Identifying the regulatory circuit and the consequence of this control in  
280 macrophage/ immune cell function would provide important insights into the diversity and  
281 complexity of mammalian innate responses.

## 282 **Material and Methods**

### 283 **Bacterial Strains and Growth Conditions-**

284 *Mycobacterium tuberculosis* strain Erdman was grown in 7H9 Middlebrook enriched with  
285 Middlebrook ADC (BD Biosciences, USA). *E. coli* and *Salmonella typhimurium* were grown in LB  
286 media (BD Biosciences, USA) at 37°C.

### 287 **Macrophage culture and Infection**

288 RPMI 1640-GlutaMAX (Himedia laboratories, Mumbai, India) supplemented with 10% fetal bovine  
289 serum (Himedia laboratories, Mumbai, India,) and 1mM sodium pyruvate (Himedia laboratories,  
290 Mumbai, India) was used to culture THP-1 monocytes. Differentiation of THP1 monocytes to  
291 macrophages was done using 100nM phorbol myristate acetate (PMA) (Sigma Aldrich, USA).  
292 *Mtb*, *E. coli* and *Salmonella typhimurium* were grown to mid-log phase at 37°C, washed twice with  
293 phosphate buffered saline (PBS) containing 0.05% Tween80, finally suspended in PBS and  
294 centrifuged at 800 rpm for 10 min to get a uniform single cell suspension. This uniform single cell  
295 suspension was diluted with complete RPMI 1640 to the required cell density and then used to  
296 infect the differentiated THP-1 macrophages at multiplicity of infection (MOI) of 5. At different time  
297 intervals, cells were harvested in RNazol (Sigma Aldrich, USA) for analysis. LPS, CLI095, poly  
298 I:C, and Pam3CSK2 were purchased from (InvivoGen, Toulouse, France). Zymosan (Sigma  
299 Aldrich, USA) was used according to the concentration mentioned.

### 300 **RNA isolation and qRT-PCR**

301 RNA isolation was done as per standard RNazol protocol. cDNA synthesis was performed from  
302 1µg RNA using verso cDNA synthesis kit (Thermo Scientific, USA). The expression level was  
303 checked by DyNAmo Flash SYBR Green qPCR kit (Thermo Scientific, USA) in Roche LC480  
304 system. *Gapdh* was used as internal control. Ct values were normalized with uninfected control.

305 **Genome locus and PCR**

306 Genome locus was analyzed using UCSC web (<https://genome.ucsc.edu/>.)

307 **Whole blood collection**

308 Confirmed cases of pulmonary TB patients between ages of 5 and 15 years were included in the  
309 study with prior consent as per the Institutional ethical committee guidelines. BCG vaccination,  
310 primary or secondary infection and single or co-infection status were recorded. HIV positive and  
311 any non-respiratory major disease patients were excluded from the study. The control samples  
312 were obtained from individuals without any overt clinical manifestation of disease. 2-3 ml blood  
313 was collected in RNAgard blood tubes (Biomatrix, USA) and stored in -80°C until RNA  
314 precipitation. RNA was isolated from frozen blood samples as per the manufacturer's  
315 recommendations.

316 **Graphs**

317 Graphs were generated using Graphpad prism or R. Student t test was used for statistical analysis  
318 of the data.

319 **Table 1: List of primers used in the study**

| Name | Primer Sequence            |
|------|----------------------------|
| 1    | CCACCCCCACGAAGAAATTATATATC |
| 2    | GTTAGAGGTGTCTGCTGCAATAATC  |
| 3    | CCAGGTTGTTGCCATCGAAG       |
| 4    | CAAGAGGGTGGTGACTIONAAGAG   |
| 5    | CTGGAATGACCCCTGACATC       |
| 6    | GGTGGGATTGAACTGAACAG       |

320

321 **Acknowledgements:** The authors thank CSIR (VR-BSC0123) and STS0016 for funding and  
322 facility maintenance and PA- CSIR-BSC0124, CSIR SRF/ RA for fellowship.

323 **Author Contributions:** PA, VR were involved in conceptualizing and design of the work, MS and  
324 RL were instrumental in sampling of blood from TB patients, the work was performed by PA and  
325 manuscript was written by VR and PA.

326 **Conflict of interest:** The authors do not have any competing interests.

327  
328 **References**

- 329 Agirre X, Meydan C, Jiang Y, Garate L, Doane AS, Li Z, Verma A, Paiva B, Martin-Subero JI, Elemento O et  
330 al. 2019. Long non-coding RNAs discriminate the stages and gene regulatory states of human  
331 humoral immune response. *Nat Commun* **10**: 821.
- 332 Ahmad I, Valverde A, Ahmad F, Naqvi AR. 2020. Long Noncoding RNA in Myeloid and Lymphoid Cell  
333 Differentiation, Polarization and Function. *Cells* **9**.
- 334 Atianand MK, Caffrey DR, Fitzgerald KA. 2017. Immunobiology of Long Noncoding RNAs. *Annu Rev*  
335 *Immunol* **35**: 177-198.
- 336 Aune TM, Spurlock CF, 3rd. 2016. Long non-coding RNAs in innate and adaptive immunity. *Virus Res* **212**:  
337 146-160.
- 338 Breschi A, Gingeras TR, Guigo R. 2017. Comparative transcriptomics in human and mouse. *Nat Rev Genet*  
339 **18**: 425-440.
- 340 Cameron A, Huynh S, Scott NE, Fridrich E, Apel D, Foster LJ, Parker CT, Gaynor EC. 2015. High-Frequency  
341 Variation of Purine Biosynthesis Genes Is a Mechanism of Success in *Campylobacter jejuni*. *mBio*  
342 **6**: e00612-00615.
- 343 Carpenter S, Fitzgerald KA. 2018. Cytokines and Long Noncoding RNAs. *Cold Spring Harb Perspect Biol* **10**.
- 344 Chen ZL, Wei LL, Shi LY, Li M, Jiang TT, Chen J, Liu CM, Yang S, Tu HH, Hu YT et al. 2017. Screening and  
345 identification of lncRNAs as potential biomarkers for pulmonary tuberculosis. *Sci Rep* **7**: 16751.
- 346 Cornejo E, Schlaermann P, Mukherjee S. 2017. How to rewire the host cell: A home improvement guide  
347 for intracellular bacteria. *J Cell Biol* **216**: 3931-3948.
- 348 Denzer L, Schrotten H, Schwerk C. 2020. From Gene to Protein-How Bacterial Virulence Factors Manipulate  
349 Host Gene Expression During Infection. *Int J Mol Sci* **21**.
- 350 Desvignes L, Wolf AJ, Ernst JD. 2012. Dynamic roles of type I and type II IFNs in early infection with  
351 *Mycobacterium tuberculosis*. *J Immunol* **188**: 6205-6215.
- 352 Duval M, Cossart P, Lebreton A. 2017. Mammalian microRNAs and long noncoding RNAs in the host-  
353 bacterial pathogen crosstalk. *Semin Cell Dev Biol* **65**: 11-19.
- 354 Eisenreich W, Rudel T, Heesemann J, Goebel W. 2017. To Eat and to Be Eaten: Mutual Metabolic  
355 Adaptations of Immune Cells and Intracellular Bacterial Pathogens upon Infection. *Front Cell Infect*  
356 *Microbiol* **7**: 316.
- 357 Fan H, Lv Z, Gan L, Ning C, Li Z, Yang M, Zhang B, Song B, Li G, Tang D et al. 2019. A Novel lncRNA Regulates  
358 the Toll-Like Receptor Signaling Pathway and Related Immune Function by Stabilizing FOS mRNA  
359 as a Competitive Endogenous RNA. *Front Immunol* **10**: 838.
- 360 Faridoghar M, Nikouejad H. 2017. New findings of Toll-like receptors involved in *Mycobacterium*  
361 *tuberculosis* infection. *Pathog Glob Health* **111**: 256-264.
- 362 Gomez JA, Wapinski OL, Yang YW, Bureau JF, Gopinath S, Monack DM, Chang HY, Brahic M, Kirkegaard K.  
363 2013. The NeST long ncRNA controls microbial susceptibility and epigenetic activation of the  
364 interferon-gamma locus. *Cell* **152**: 743-754.

- 365 Hardison RL, Heimlich DR, Harrison A, Beatty WL, Rains S, Moseley MA, Thompson JW, Justice SS, Mason  
366 KM. 2018. Transient Nutrient Deprivation Promotes Macropinocytosis-Dependent Intracellular  
367 Bacterial Community Development. *mSphere* **3**.
- 368 Hayward JA, Mathur A, Ngo C, Man SM. 2018. Cytosolic Recognition of Microbes and Pathogens:  
369 Inflammasomes in Action. *Microbiol Mol Biol Rev* **82**.
- 370 Huang J, Brumell JH. 2014. Bacteria-autophagy interplay: a battle for survival. *Nat Rev Microbiol* **12**: 101-  
371 114.
- 372 Huang S, Huang Z, Luo Q, Qing C. 2018. The Expression of lncRNA NEAT1 in Human Tuberculosis and Its  
373 Antituberculosis Effect. *Biomed Res Int* **2018**: 9529072.
- 374 Imamura K, Akimitsu N. 2014. Long Non-Coding RNAs Involved in Immune Responses. *Front Immunol* **5**:  
375 573.
- 376 Jackson R, Kroehling L, Khitun A, Bailis W, Jarret A, York AG, Khan OM, Brewer JR, Skadow MH, Duizer C et  
377 al. 2018. The translation of non-canonical open reading frames controls mucosal immunity.  
378 *Nature* **564**: 434-438.
- 379 Jimenez A, Chen D, Alto NM. 2016. How Bacteria Subvert Animal Cell Structure and Function. *Annu Rev*  
380 *Cell Dev Biol* **32**: 373-397.
- 381 Kalam H, Fontana MF, Kumar D. 2017. Alternate splicing of transcripts shape macrophage response to  
382 *Mycobacterium tuberculosis* infection. *PLoS Pathog* **13**: e1006236.
- 383 Kambara H, Niazi F, Kostadinova L, Moonka DK, Siegel CT, Post AB, Carnero E, Barriocanal M, Fortes P,  
384 Anthony DD et al. 2014. Negative regulation of the interferon response by an interferon-induced  
385 long non-coding RNA. *Nucleic Acids Res* **42**: 10668-10680.
- 386 Kleinnijenhuis J, Oosting M, Joosten LA, Netea MG, Van Crevel R. 2011. Innate immune recognition of  
387 *Mycobacterium tuberculosis*. *Clin Dev Immunol* **2011**: 405310.
- 388 Lagarde J, Uszczyńska-Ratajczak B, Carbonell S, Perez-Lluch S, Abad A, Davis C, Gingeras TR, Frankish A,  
389 Harrow J, Guigo R et al. 2017. High-throughput annotation of full-length long noncoding RNAs  
390 with capture long-read sequencing. *Nat Genet* **49**: 1731-1740.
- 391 Li J, Wu L, Guo W, Chen J, Hu X, Wang M, Zhao Z, Ying B. 2017. Clinical relevance of LINC00152 and its  
392 variants in western Chinese tuberculosis patients. *Oncotarget* **8**: 115456-115468.
- 393 Liu S, Liu X, Li J, Zhou H, Carr MJ, Zhang Z, Shi W. 2019. Long noncoding RNAs: Novel regulators of virus-  
394 host interactions. *Rev Med Virol* **29**: e2046.
- 395 Liu W, Huang L, Wei Q, Zhang Y, Zhang S, Zhang W, Cai L, Liang S. 2018. Microarray analysis of long non-  
396 coding RNA expression profiles uncovers a *Toxoplasma*-induced negative regulation of host  
397 immune signaling. *Parasit Vectors* **11**: 174.
- 398 Ma Z, Zhang J, Xu X, Qu Y, Dong H, Dang J, Huo Z, Xu G. 2019. lncRNA expression profile during autophagy  
399 and Malat1 function in macrophages. *PLoS One* **14**: e0221104.
- 400 Menard KL, Haskins BE, Colombo AP, Denkers EY. 2018. *Toxoplasma gondii* Manipulates Expression of  
401 Host Long Noncoding RNA during Intracellular Infection. *Sci Rep* **8**: 15017.
- 402 Menon MP, Hua KF. 2020. The Long Non-coding RNAs: Paramount Regulators of the NLRP3  
403 Inflammasome. *Front Immunol* **11**: 569524.
- 404 Moon HG, Yang J, Zheng Y, Jin Y. 2014. miR-15a/16 regulates macrophage phagocytosis after bacterial  
405 infection. *J Immunol* **193**: 4558-4567.
- 406 Nguyen H, Gazy N, Venketaraman V. 2020. A Role of Intracellular Toll-Like Receptors (3, 7, and 9) in  
407 Response to *Mycobacterium tuberculosis* and Co-Infection with HIV. *Int J Mol Sci* **21**.
- 408 Novikov A, Cardone M, Thompson R, Shenderov K, Kirschman KD, Mayer-Barber KD, Myers TG, Rabin RL,  
409 Trinchieri G, Sher A et al. 2011. *Mycobacterium tuberculosis* triggers host type I IFN signaling to  
410 regulate IL-1 $\beta$  production in human macrophages. *J Immunol* **187**: 2540-2547.



- 411 Ouyang J, Zhu X, Chen Y, Wei H, Chen Q, Chi X, Qi B, Zhang L, Zhao Y, Gao GF et al. 2014. NRAV, a long  
412 noncoding RNA, modulates antiviral responses through suppression of interferon-stimulated  
413 gene transcription. *Cell Host Microbe* **16**: 616-626.
- 414 Passalacqua KD, Charbonneau ME, O'Riordan MXD. 2016. Bacterial Metabolism Shapes the Host-  
415 Pathogen Interface. *Microbiol Spectr* **4**.
- 416 Robinson EK, Covarrubias S, Carpenter S. 2020. The how and why of lncRNA function: An innate immune  
417 perspective. *Biochim Biophys Acta Gene Regul Mech* **1863**: 194419.
- 418 Roy S, Schmeier S, Kaczkowski B, Arner E, Alam T, Ozturk M, Tamgue O, Parihar SP, Kawaji H, Itoh M et al.  
419 2018. Transcriptional landscape of Mycobacterium tuberculosis infection in macrophages. *Sci Rep*  
420 **8**: 6758.
- 421 Sharbati S, Ravon F, Einspanier R, Zur Bruegge J. 2019. Mycobacterium smegmatis But Not Mycobacterium  
422 avium subsp. hominissuis Causes Increased Expression of the Long Non-Coding RNA MEG3 in THP-  
423 1-Derived Human Macrophages and Associated Decrease of TGF-beta. *Microorganisms* **7**.
- 424 Sigdel KR, Cheng A, Wang Y, Duan L, Zhang Y. 2015. The Emerging Functions of Long Noncoding RNA in  
425 Immune Cells: Autoimmune Diseases. *J Immunol Res* **2015**: 848790.
- 426 Spurlock CF, 3rd, Crooke PS, 3rd, Aune TM. 2016. Biogenesis and Transcriptional Regulation of Long  
427 Noncoding RNAs in the Human Immune System. *J Immunol* **197**: 4509-4517.
- 428 Srikumar S, Kroger C, Hebrard M, Colgan A, Owen SV, Sivasankaran SK, Cameron AD, Hokamp K, Hinton  
429 JC. 2015. RNA-seq Brings New Insights to the Intra-Macrophage Transcriptome of Salmonella  
430 Typhimurium. *PLoS Pathog* **11**: e1005262.
- 431 Wang P, Xue Y, Han Y, Lin L, Wu C, Xu S, Jiang Z, Xu J, Liu Q, Cao X. 2014. The STAT3-binding long noncoding  
432 RNA lnc-DC controls human dendritic cell differentiation. *Science* **344**: 310-313.
- 433 Wang Y, Zhong H, Xie X, Chen CY, Huang D, Shen L, Zhang H, Chen ZW, Zeng G. 2015. Long noncoding RNA  
434 derived from CD244 signaling epigenetically controls CD8+ T-cell immune responses in  
435 tuberculosis infection. *Proc Natl Acad Sci U S A* **112**: E3883-3892.
- 436 Weiss G, Schaible UE. 2015. Macrophage defense mechanisms against intracellular bacteria. *Immunol Rev*  
437 **264**: 182-203.
- 438 Winchell CG, Steele S, Kawula T, Voth DE. 2016. Dining in: intracellular bacterial pathogen interplay with  
439 autophagy. *Curr Opin Microbiol* **29**: 9-14.
- 440 Wu Q, Zhong H, Bai H, Liu T, Song J, Wen Y, Song X, Ying B. 2020. Clinical relevance of the lnc-HNF1B-3:1  
441 genetic polymorphisms in Western Chinese tuberculosis patients. *J Clin Lab Anal* **34**: e23076.
- 442 Xie Y, Wang M, Tian J, Li X, Yang M, Zhang K, Tan S, Luo L, Luo C, Peng L et al. 2019. Long non-coding RNA  
443 expressed in macrophage co-varies with the inflammatory phenotype during macrophage  
444 development and polarization. *J Cell Mol Med* **23**: 6530-6542.
- 445 Yan H, Xu R, Zhang X, Wang Q, Pang J, Chang X, Zhang Y. 2018. Identifying differentially expressed long  
446 non-coding RNAs in PBMCs in response to the infection of multidrug-resistant tuberculosis. *Infect*  
447 *Drug Resist* **11**: 945-959.
- 448 Yang X, Yang J, Wang J, Wen Q, Wang H, He J, Hu S, He W, Du X, Liu S et al. 2016. Microarray analysis of  
449 long noncoding RNA and mRNA expression profiles in human macrophages infected with  
450 Mycobacterium tuberculosis. *Sci Rep* **6**: 38963.
- 451 Yu AD, Wang Z, Morris KV. 2015. Long noncoding RNAs: a potent source of regulation in immunity and  
452 disease. *Immunol Cell Biol* **93**: 277-283.
- 453 Zur Bruegge J, Einspanier R, Sharbati S. 2017. A Long Journey Ahead: Long Non-coding RNAs in Bacterial  
454 Infections. *Front Cell Infect Microbiol* **7**: 95.

455

456



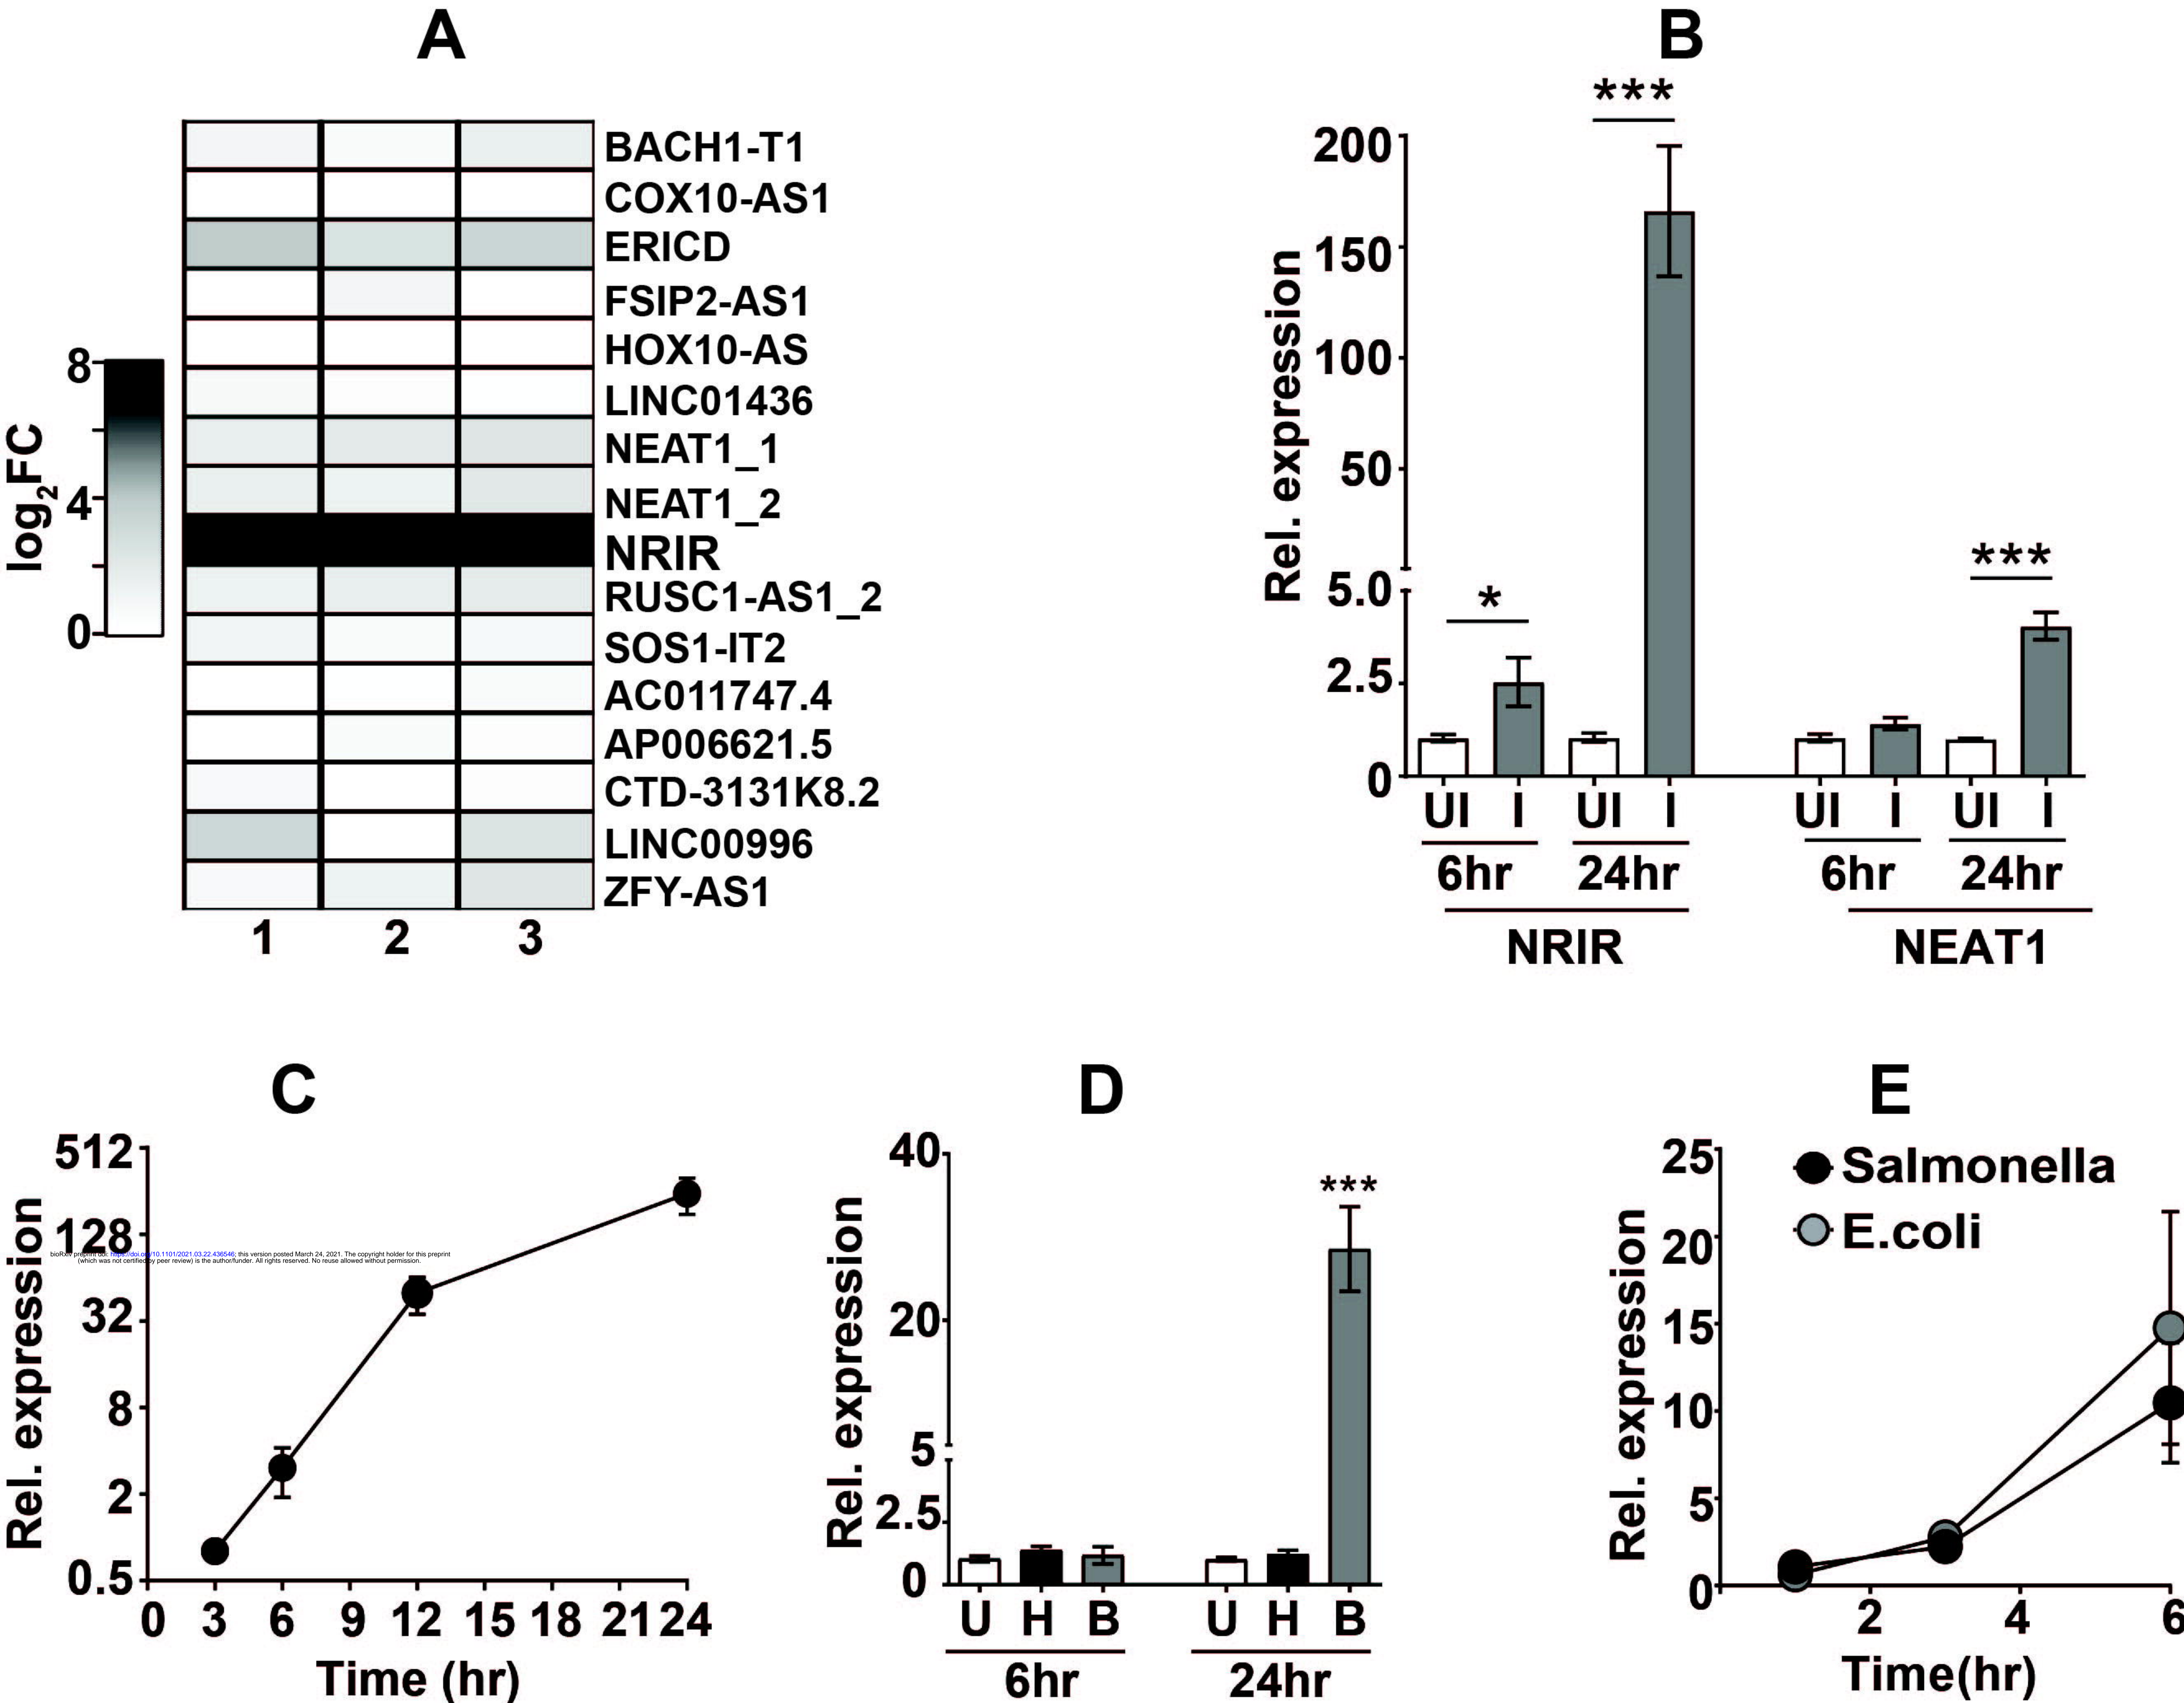

**Fig. 1**



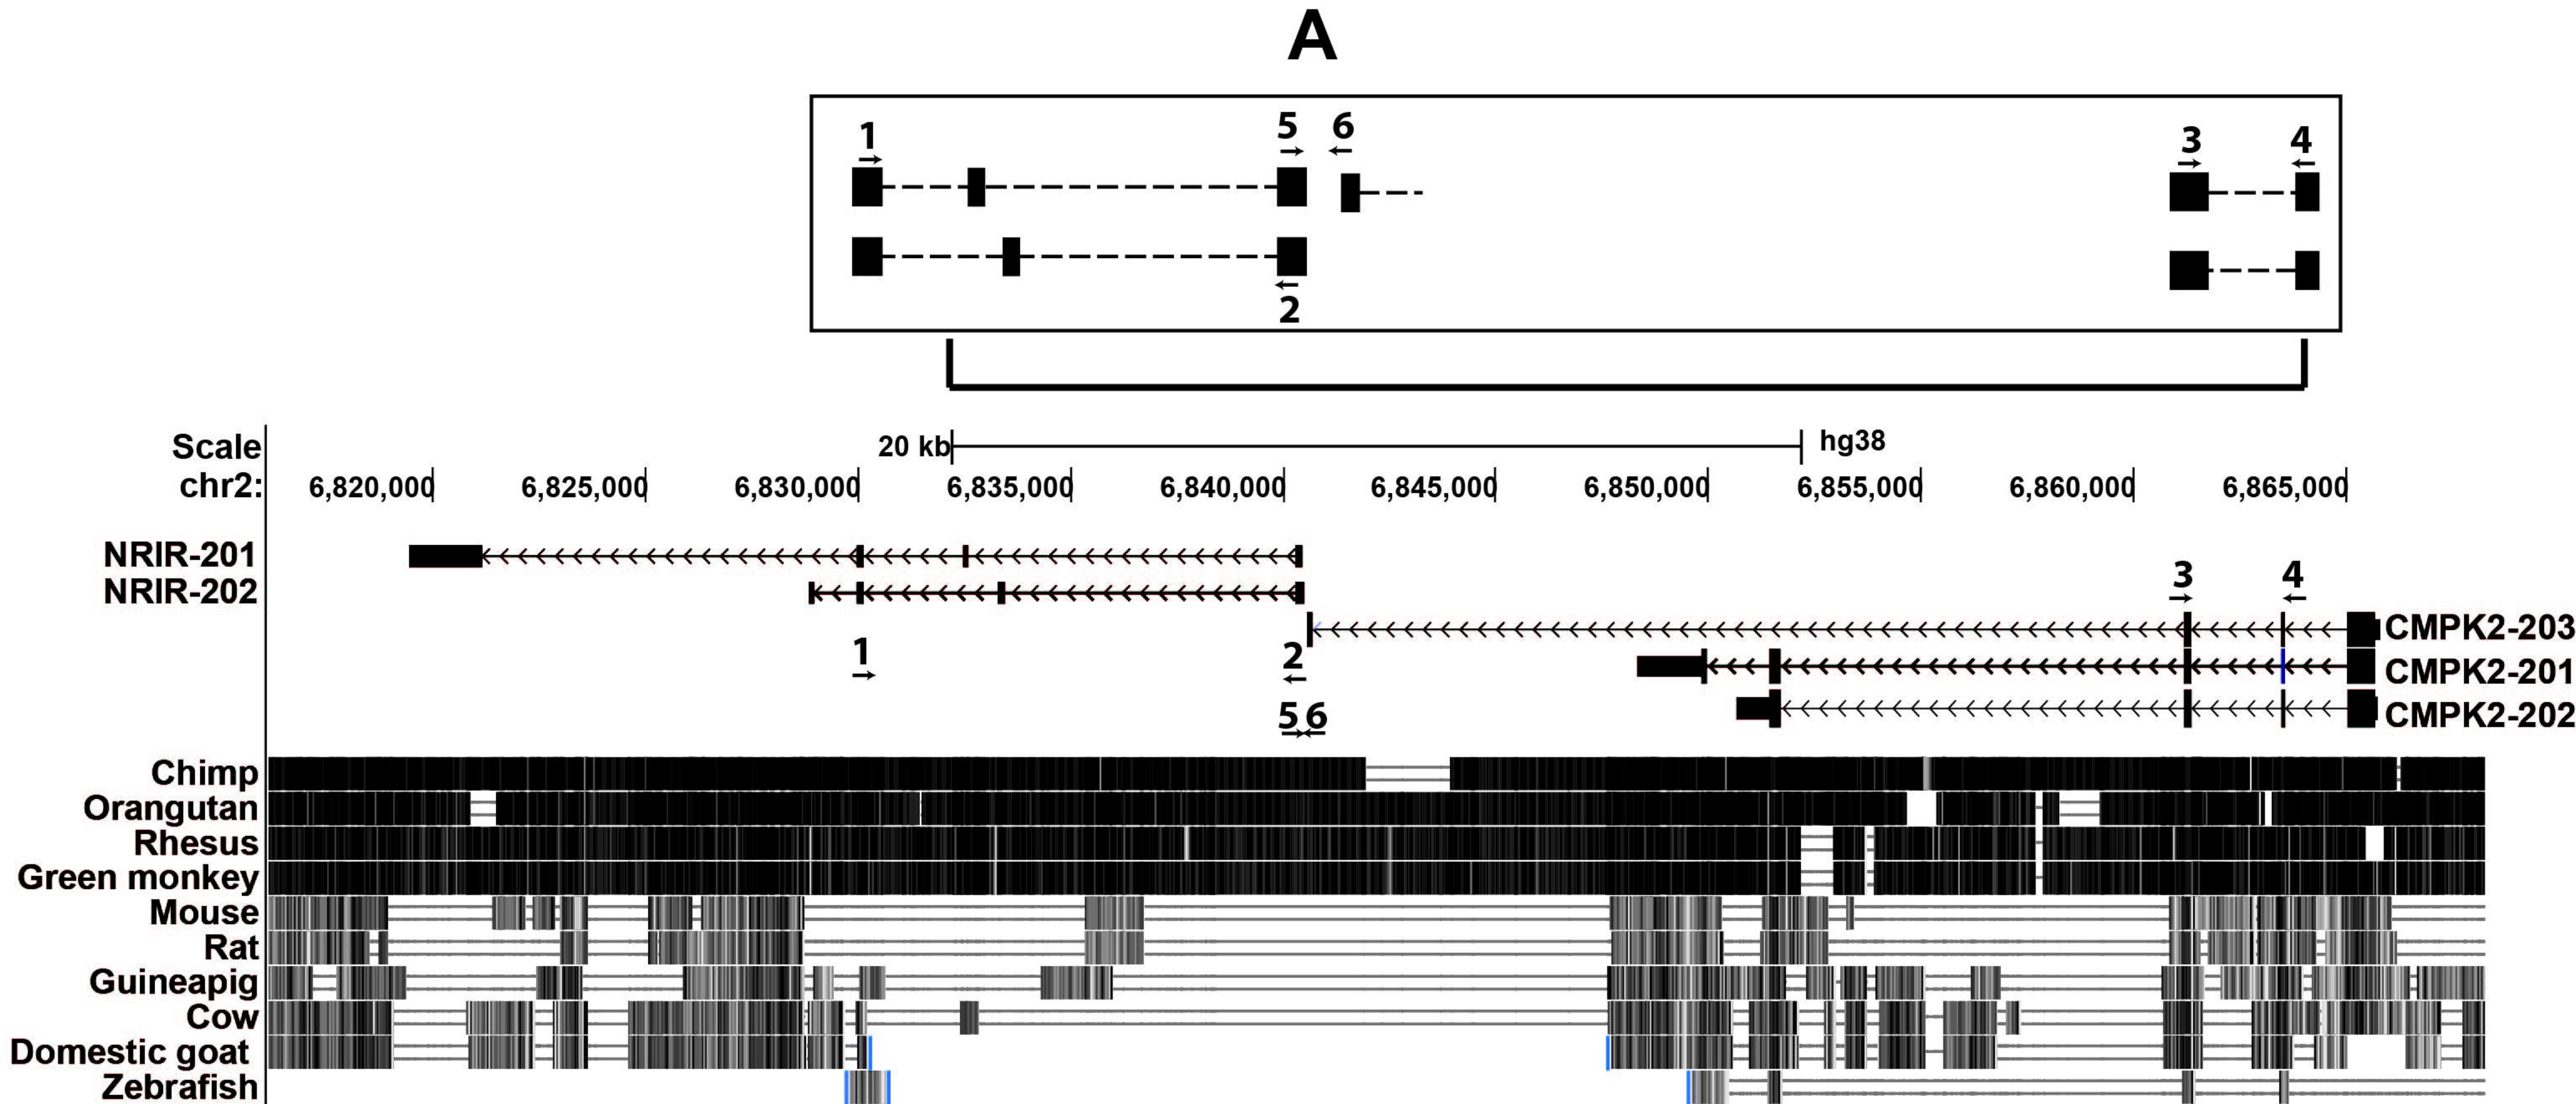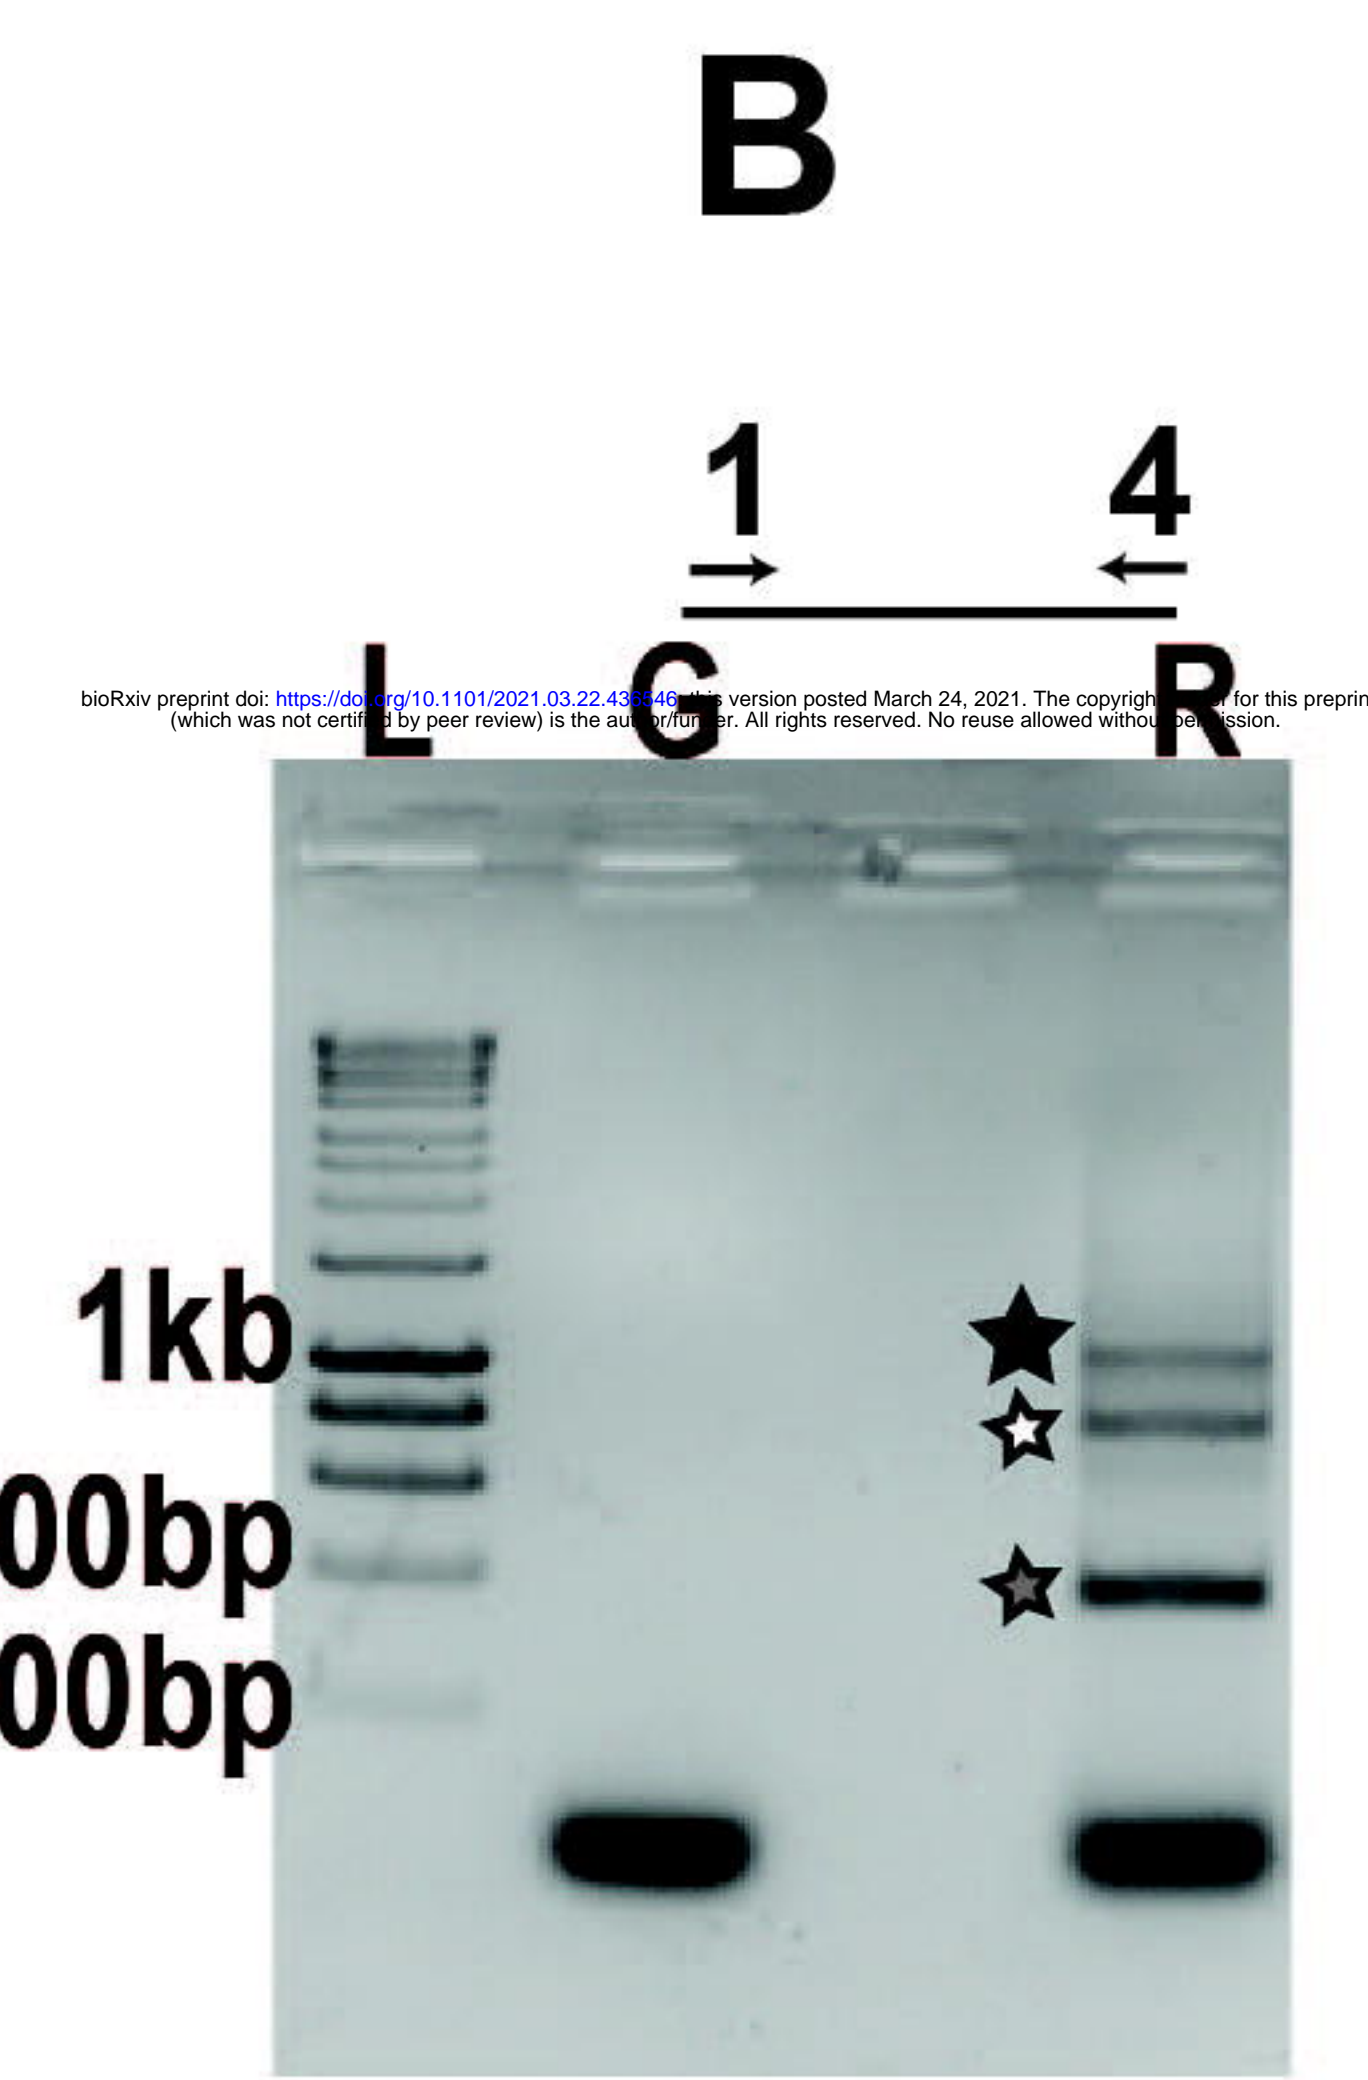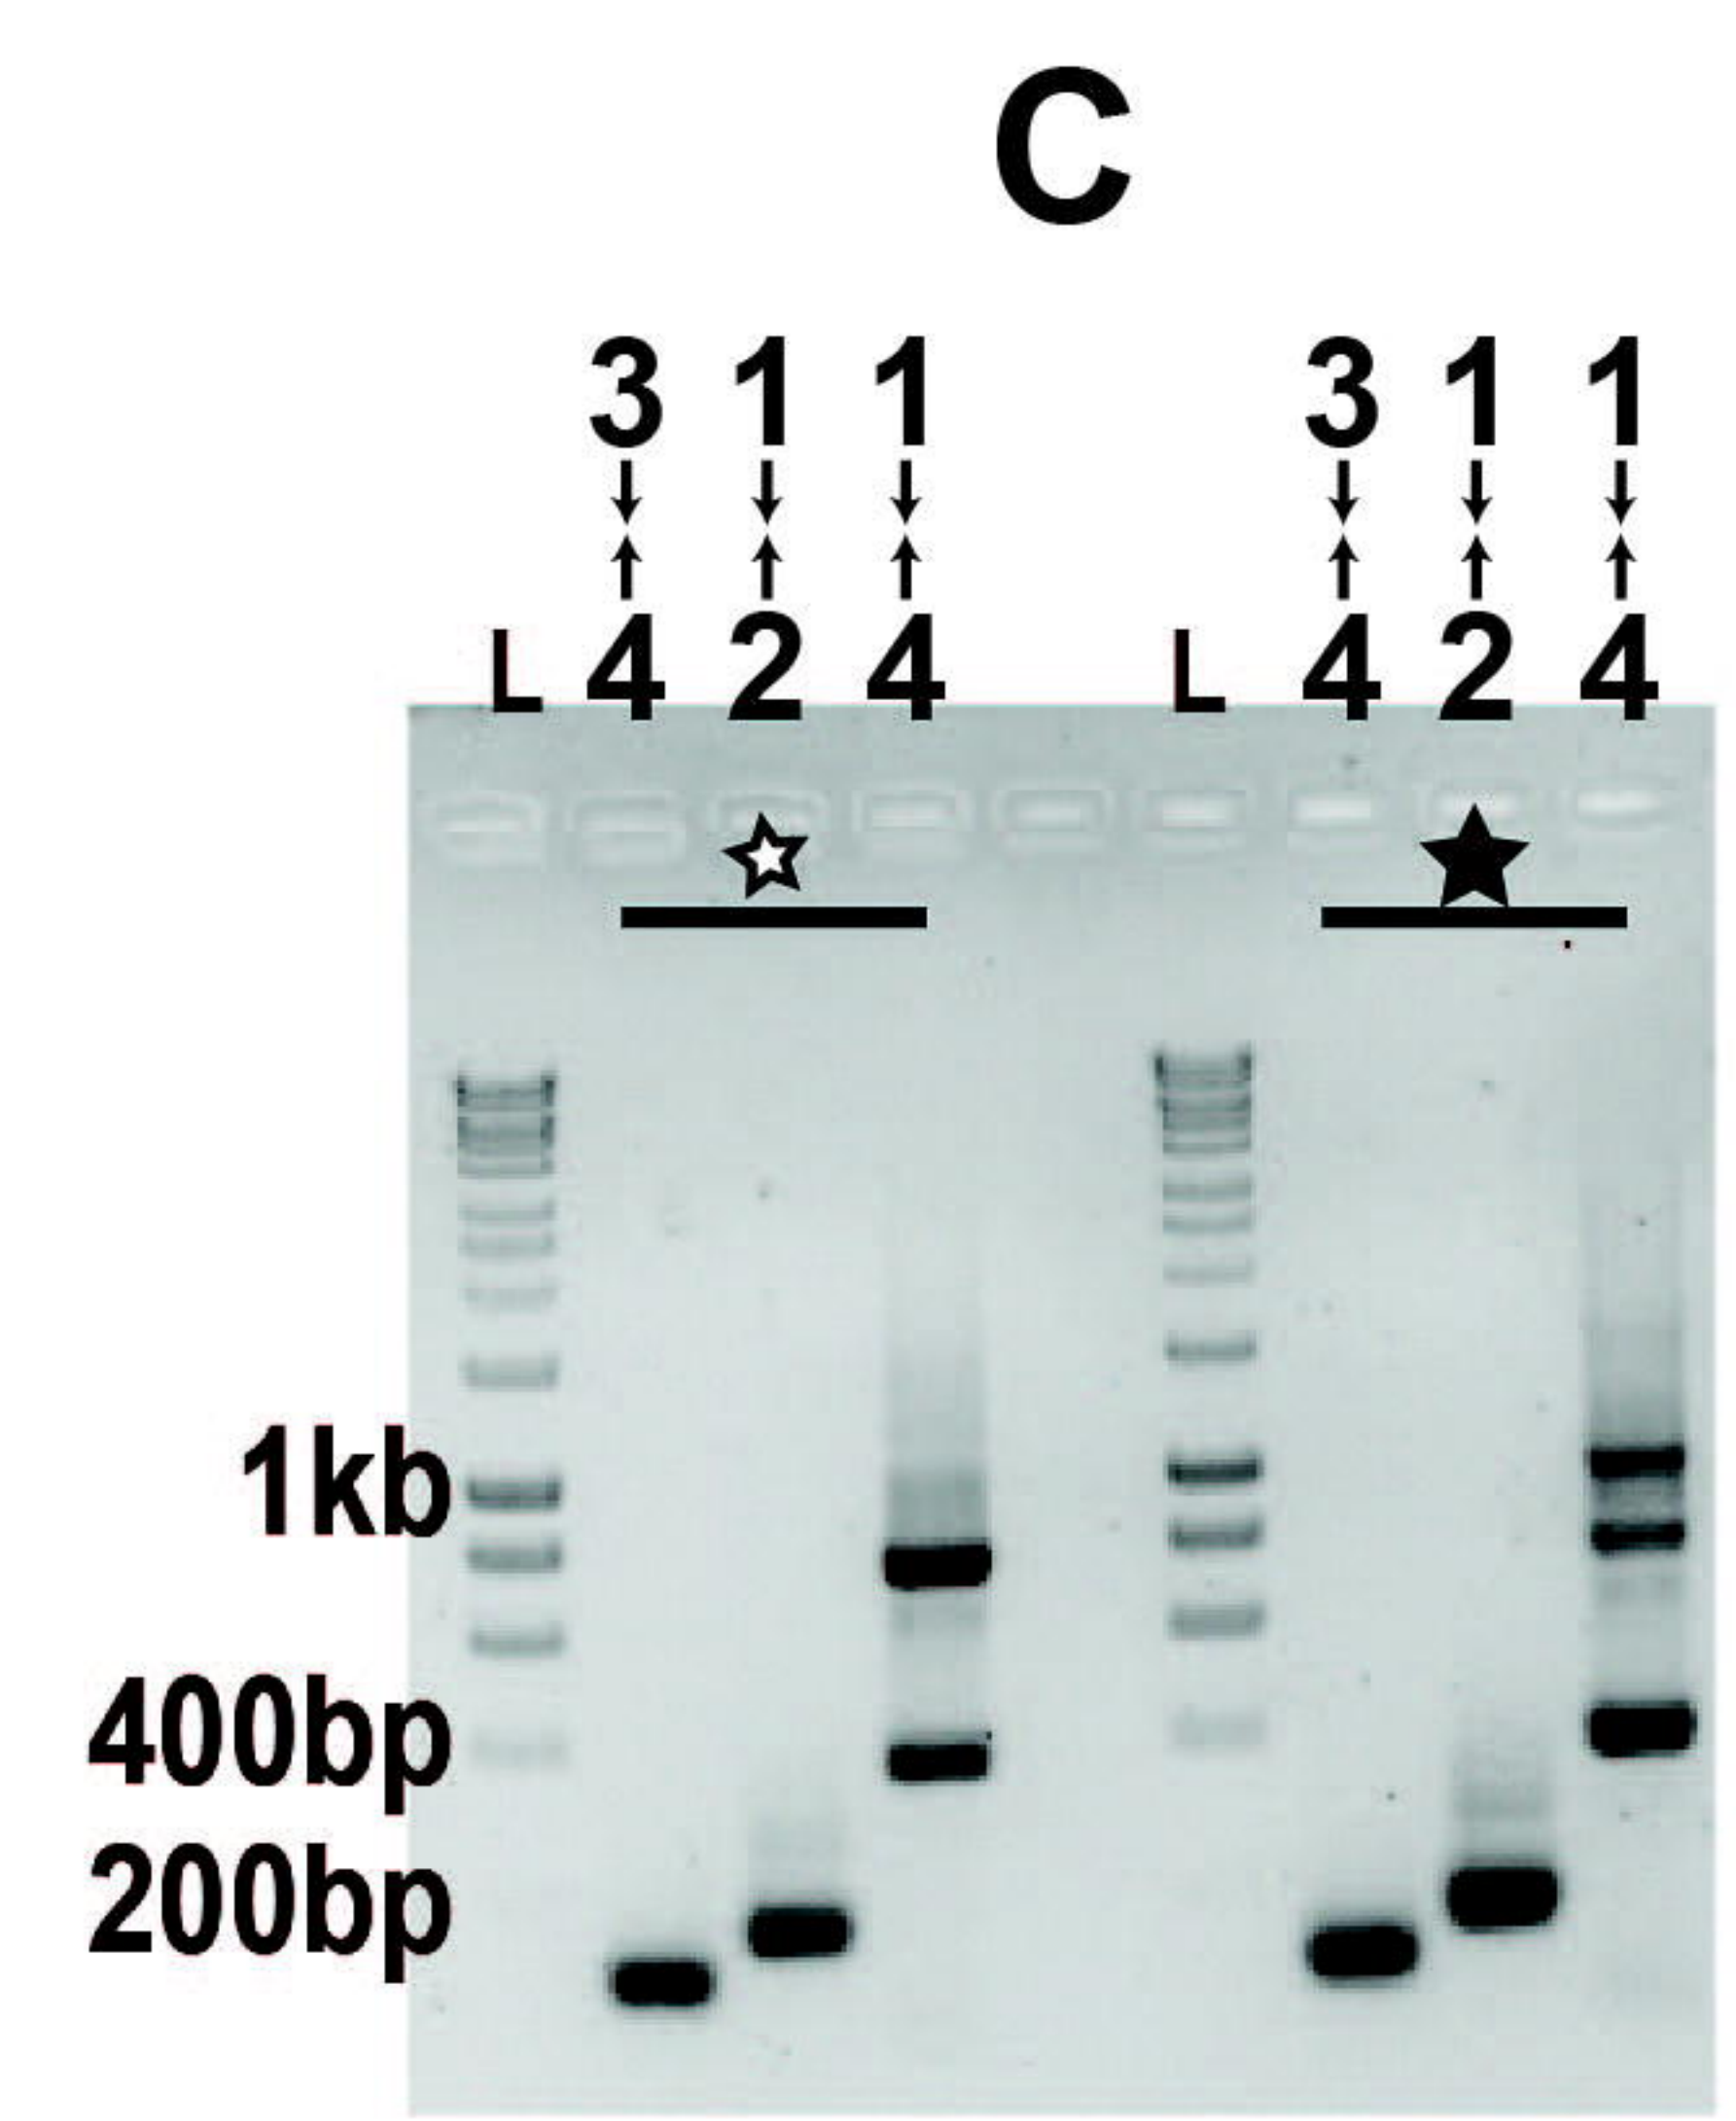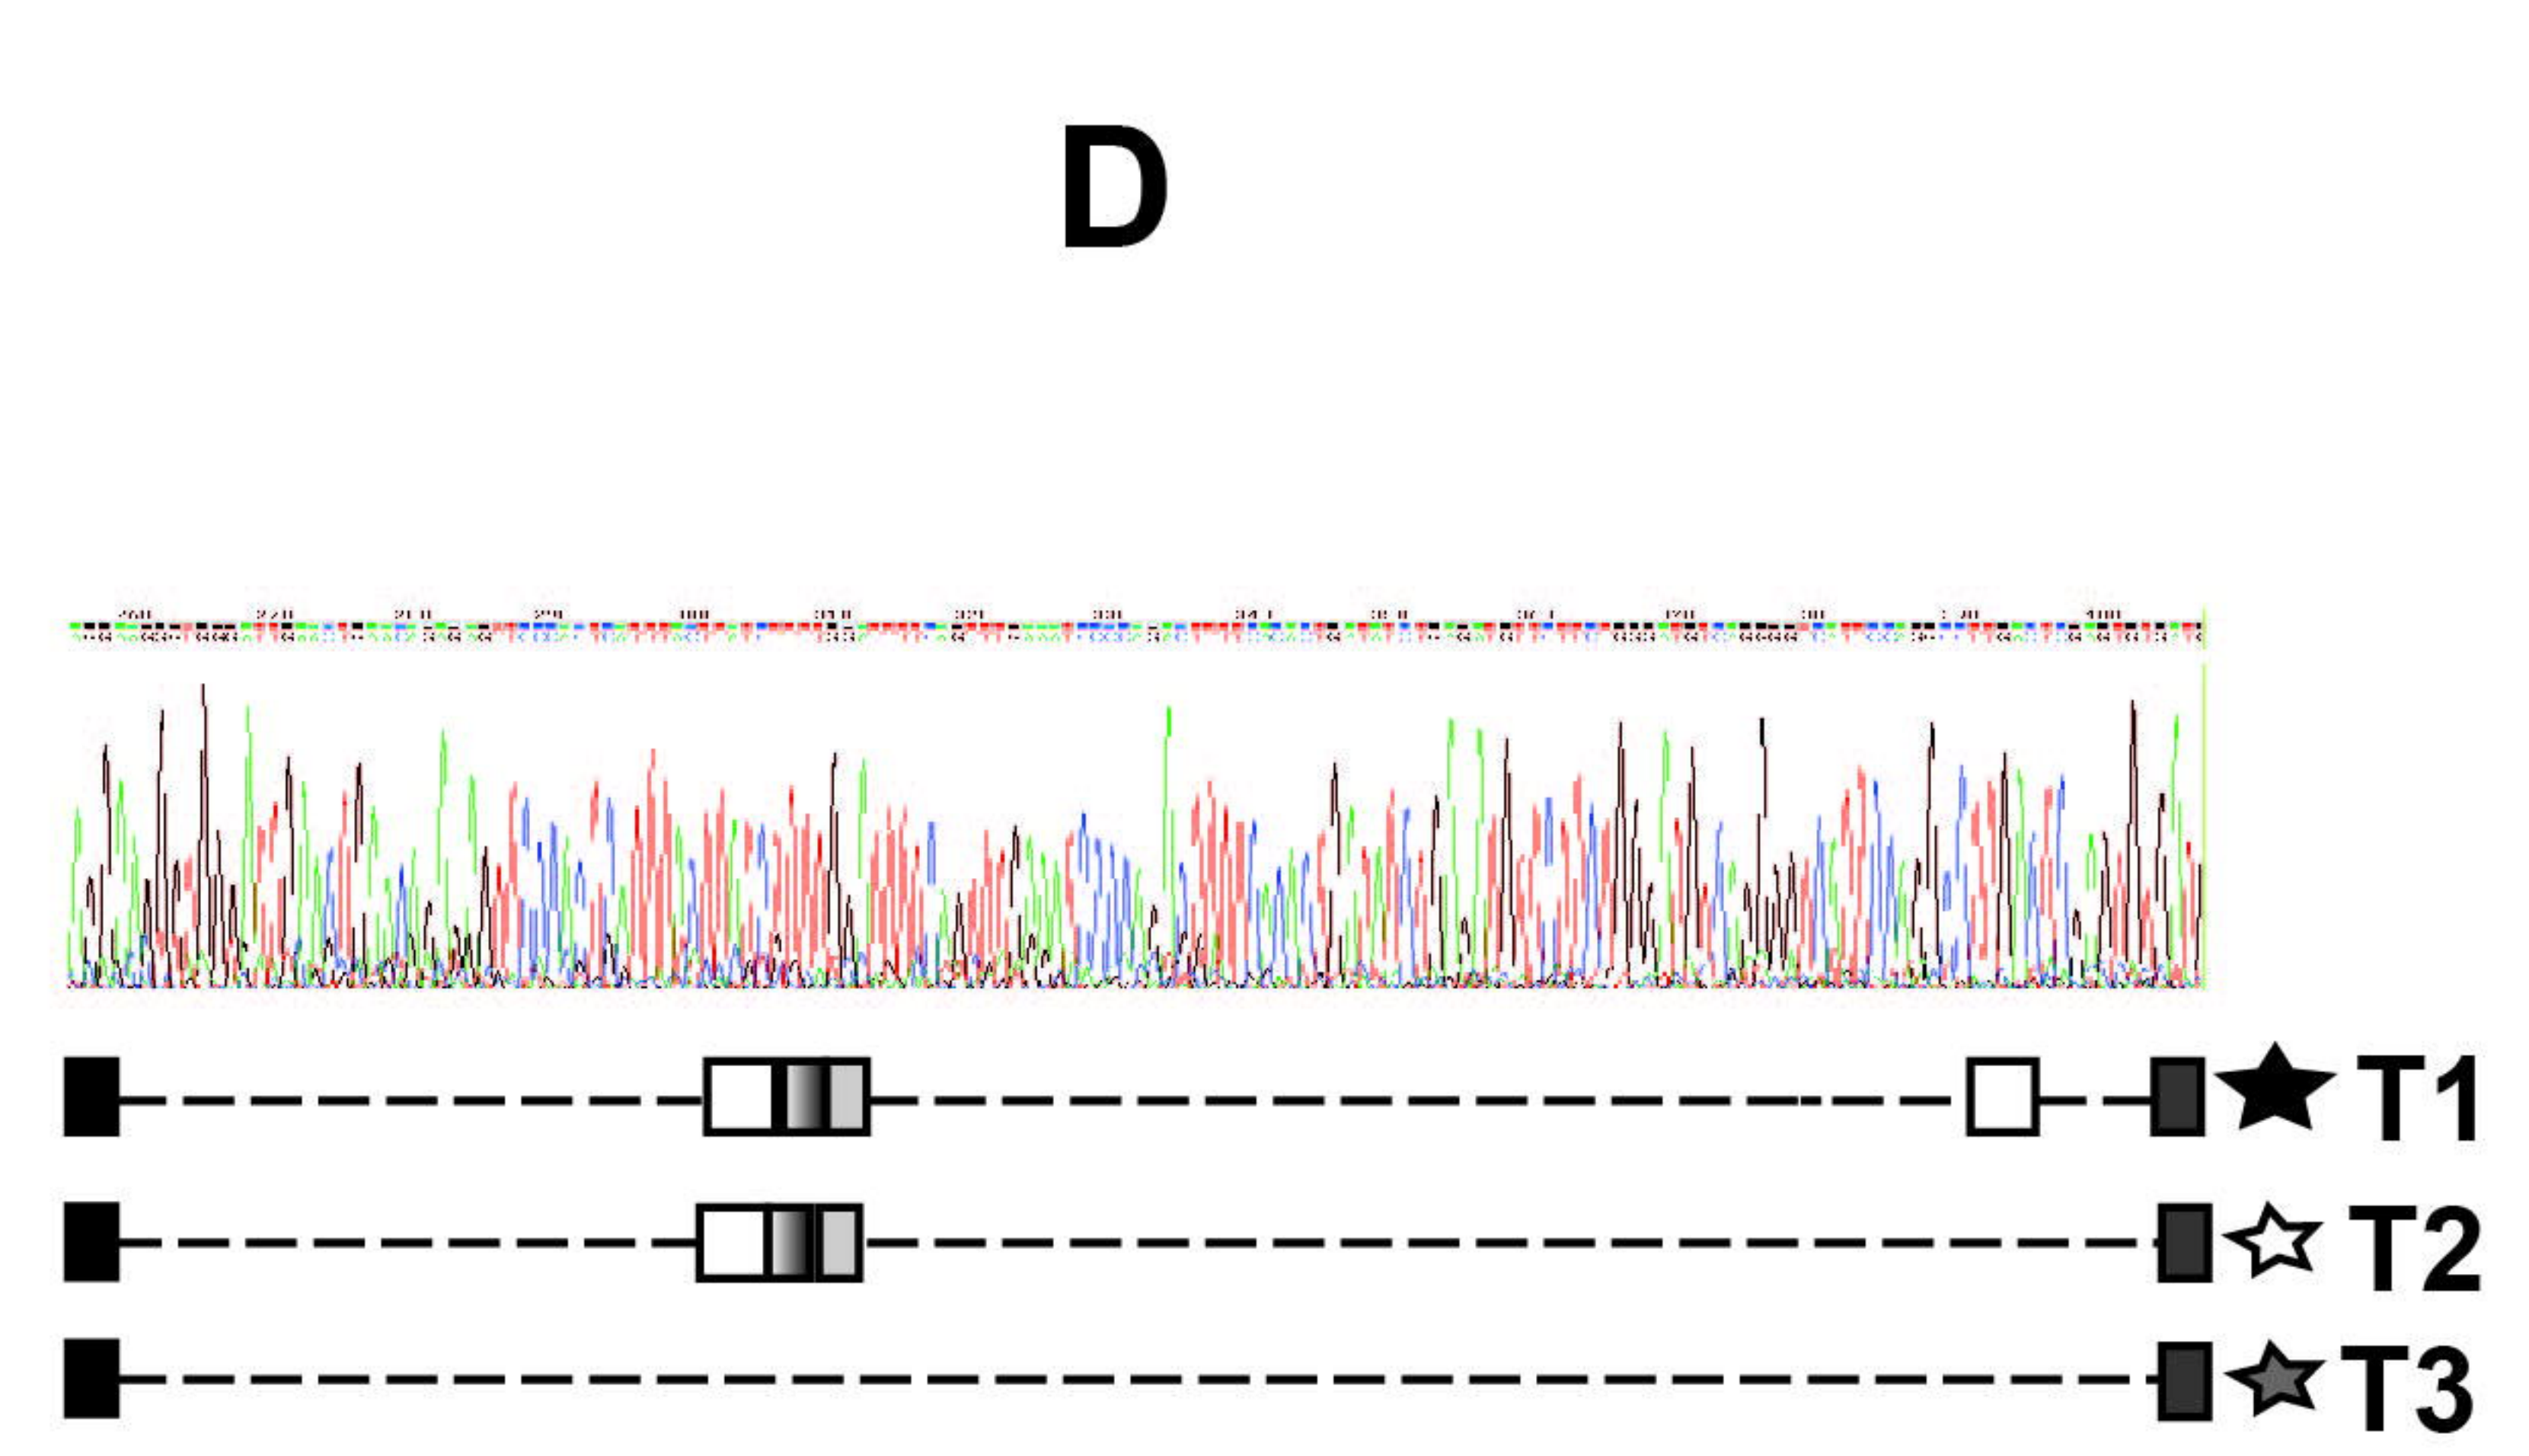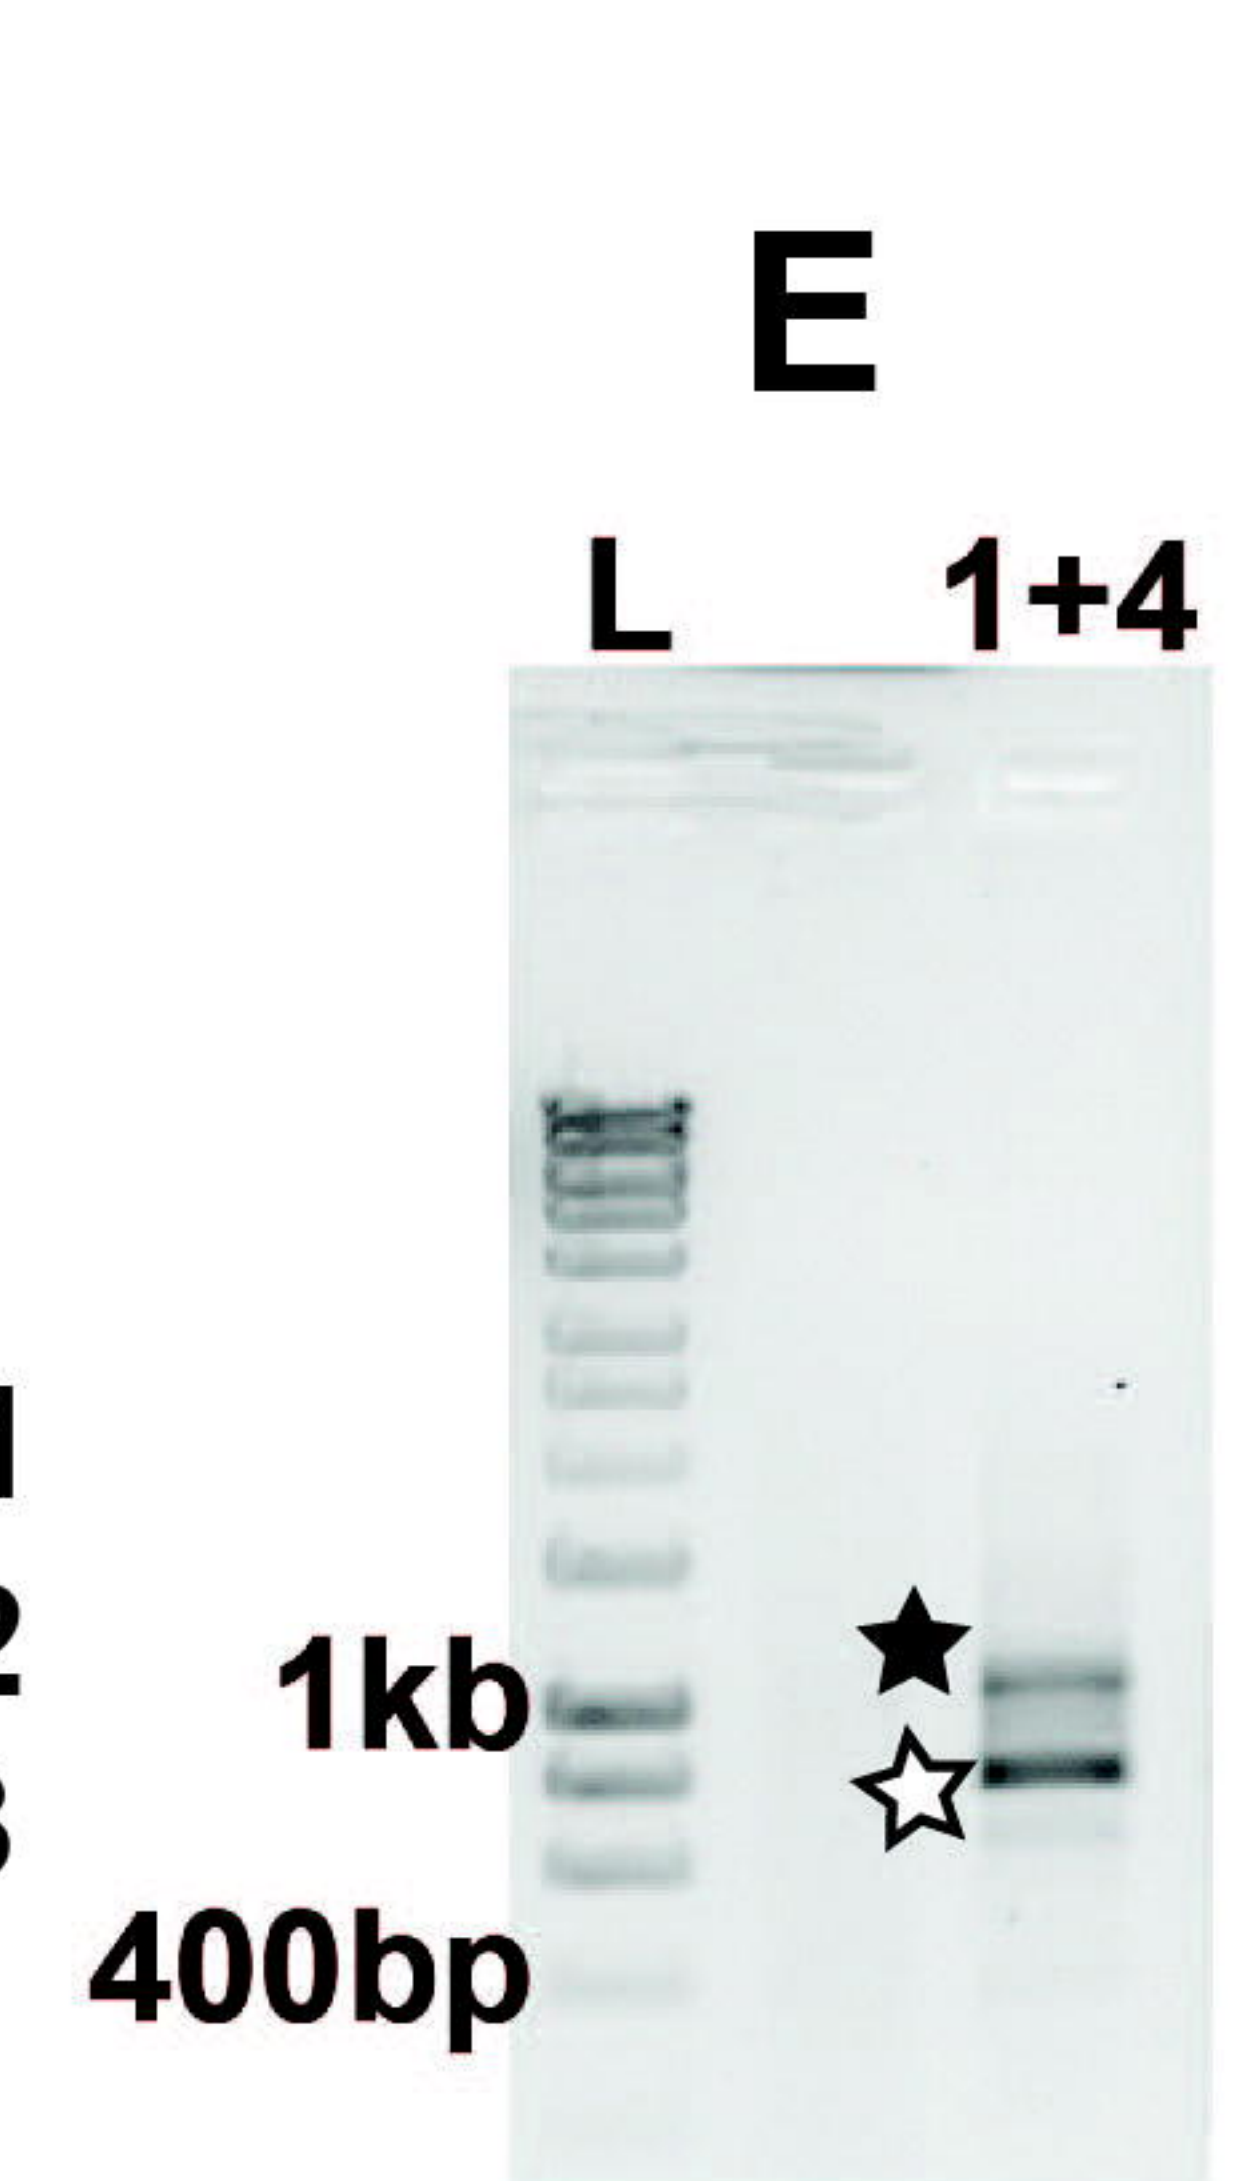

**Fig. 2**



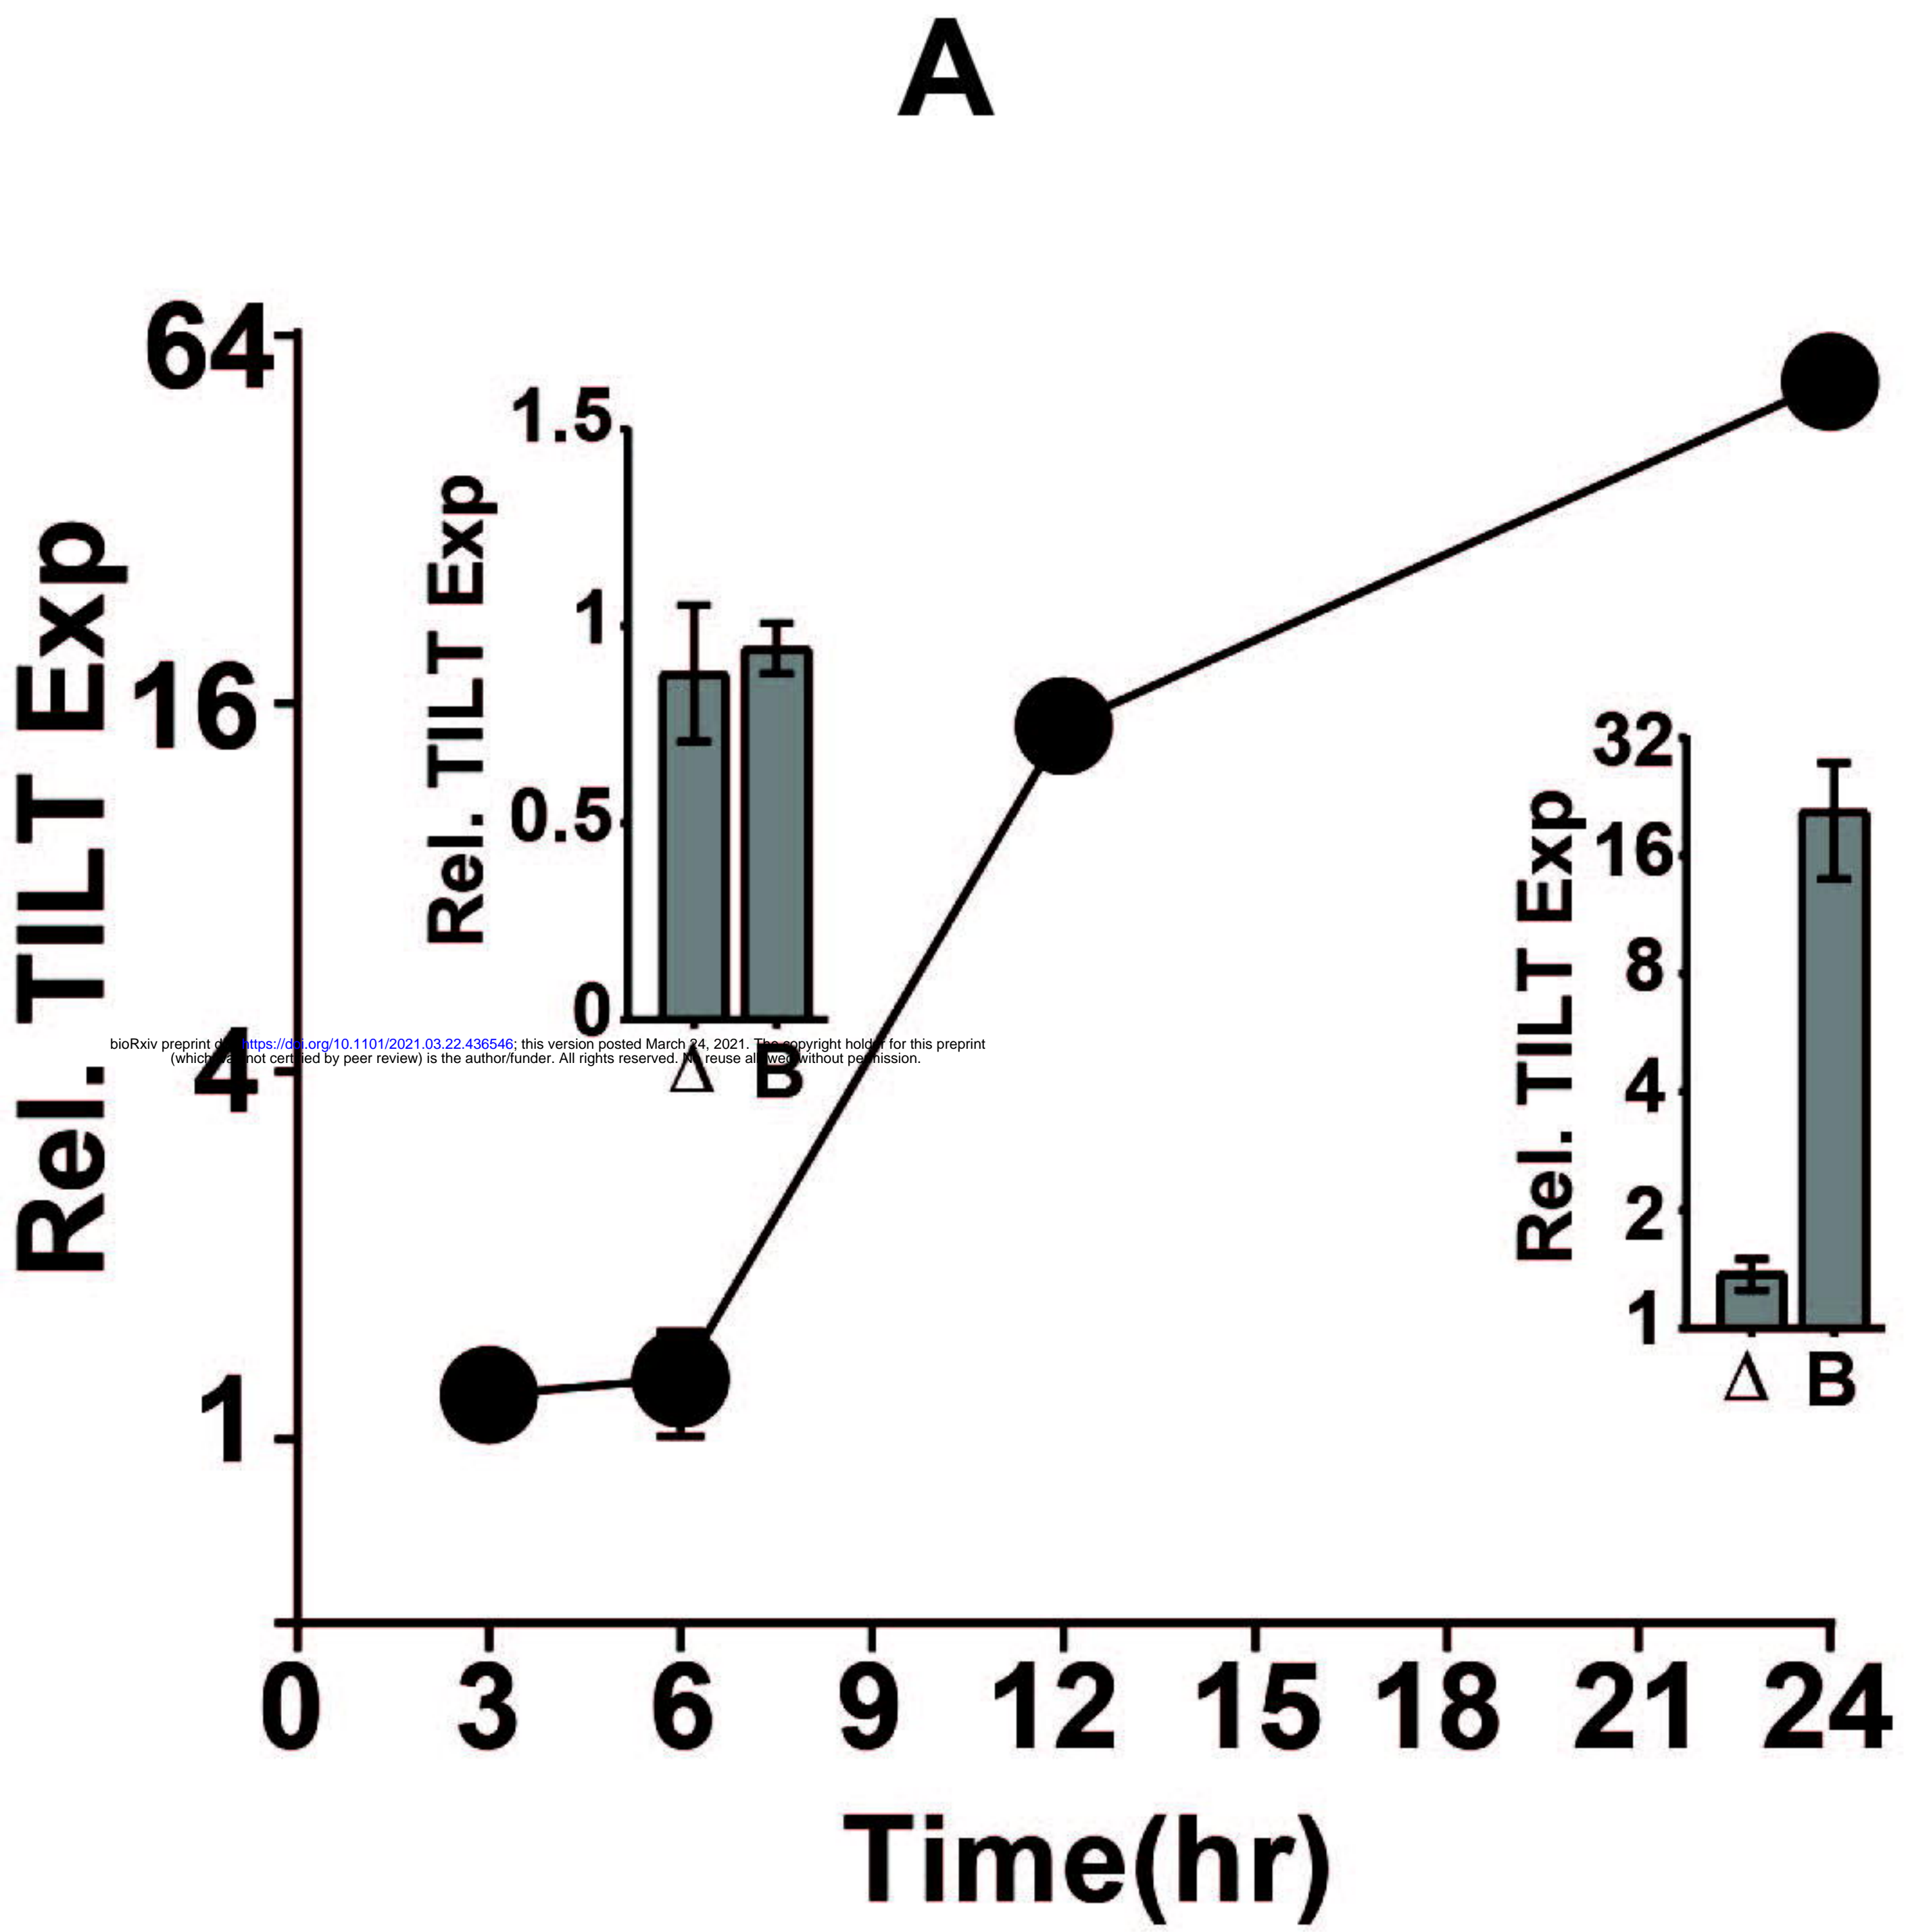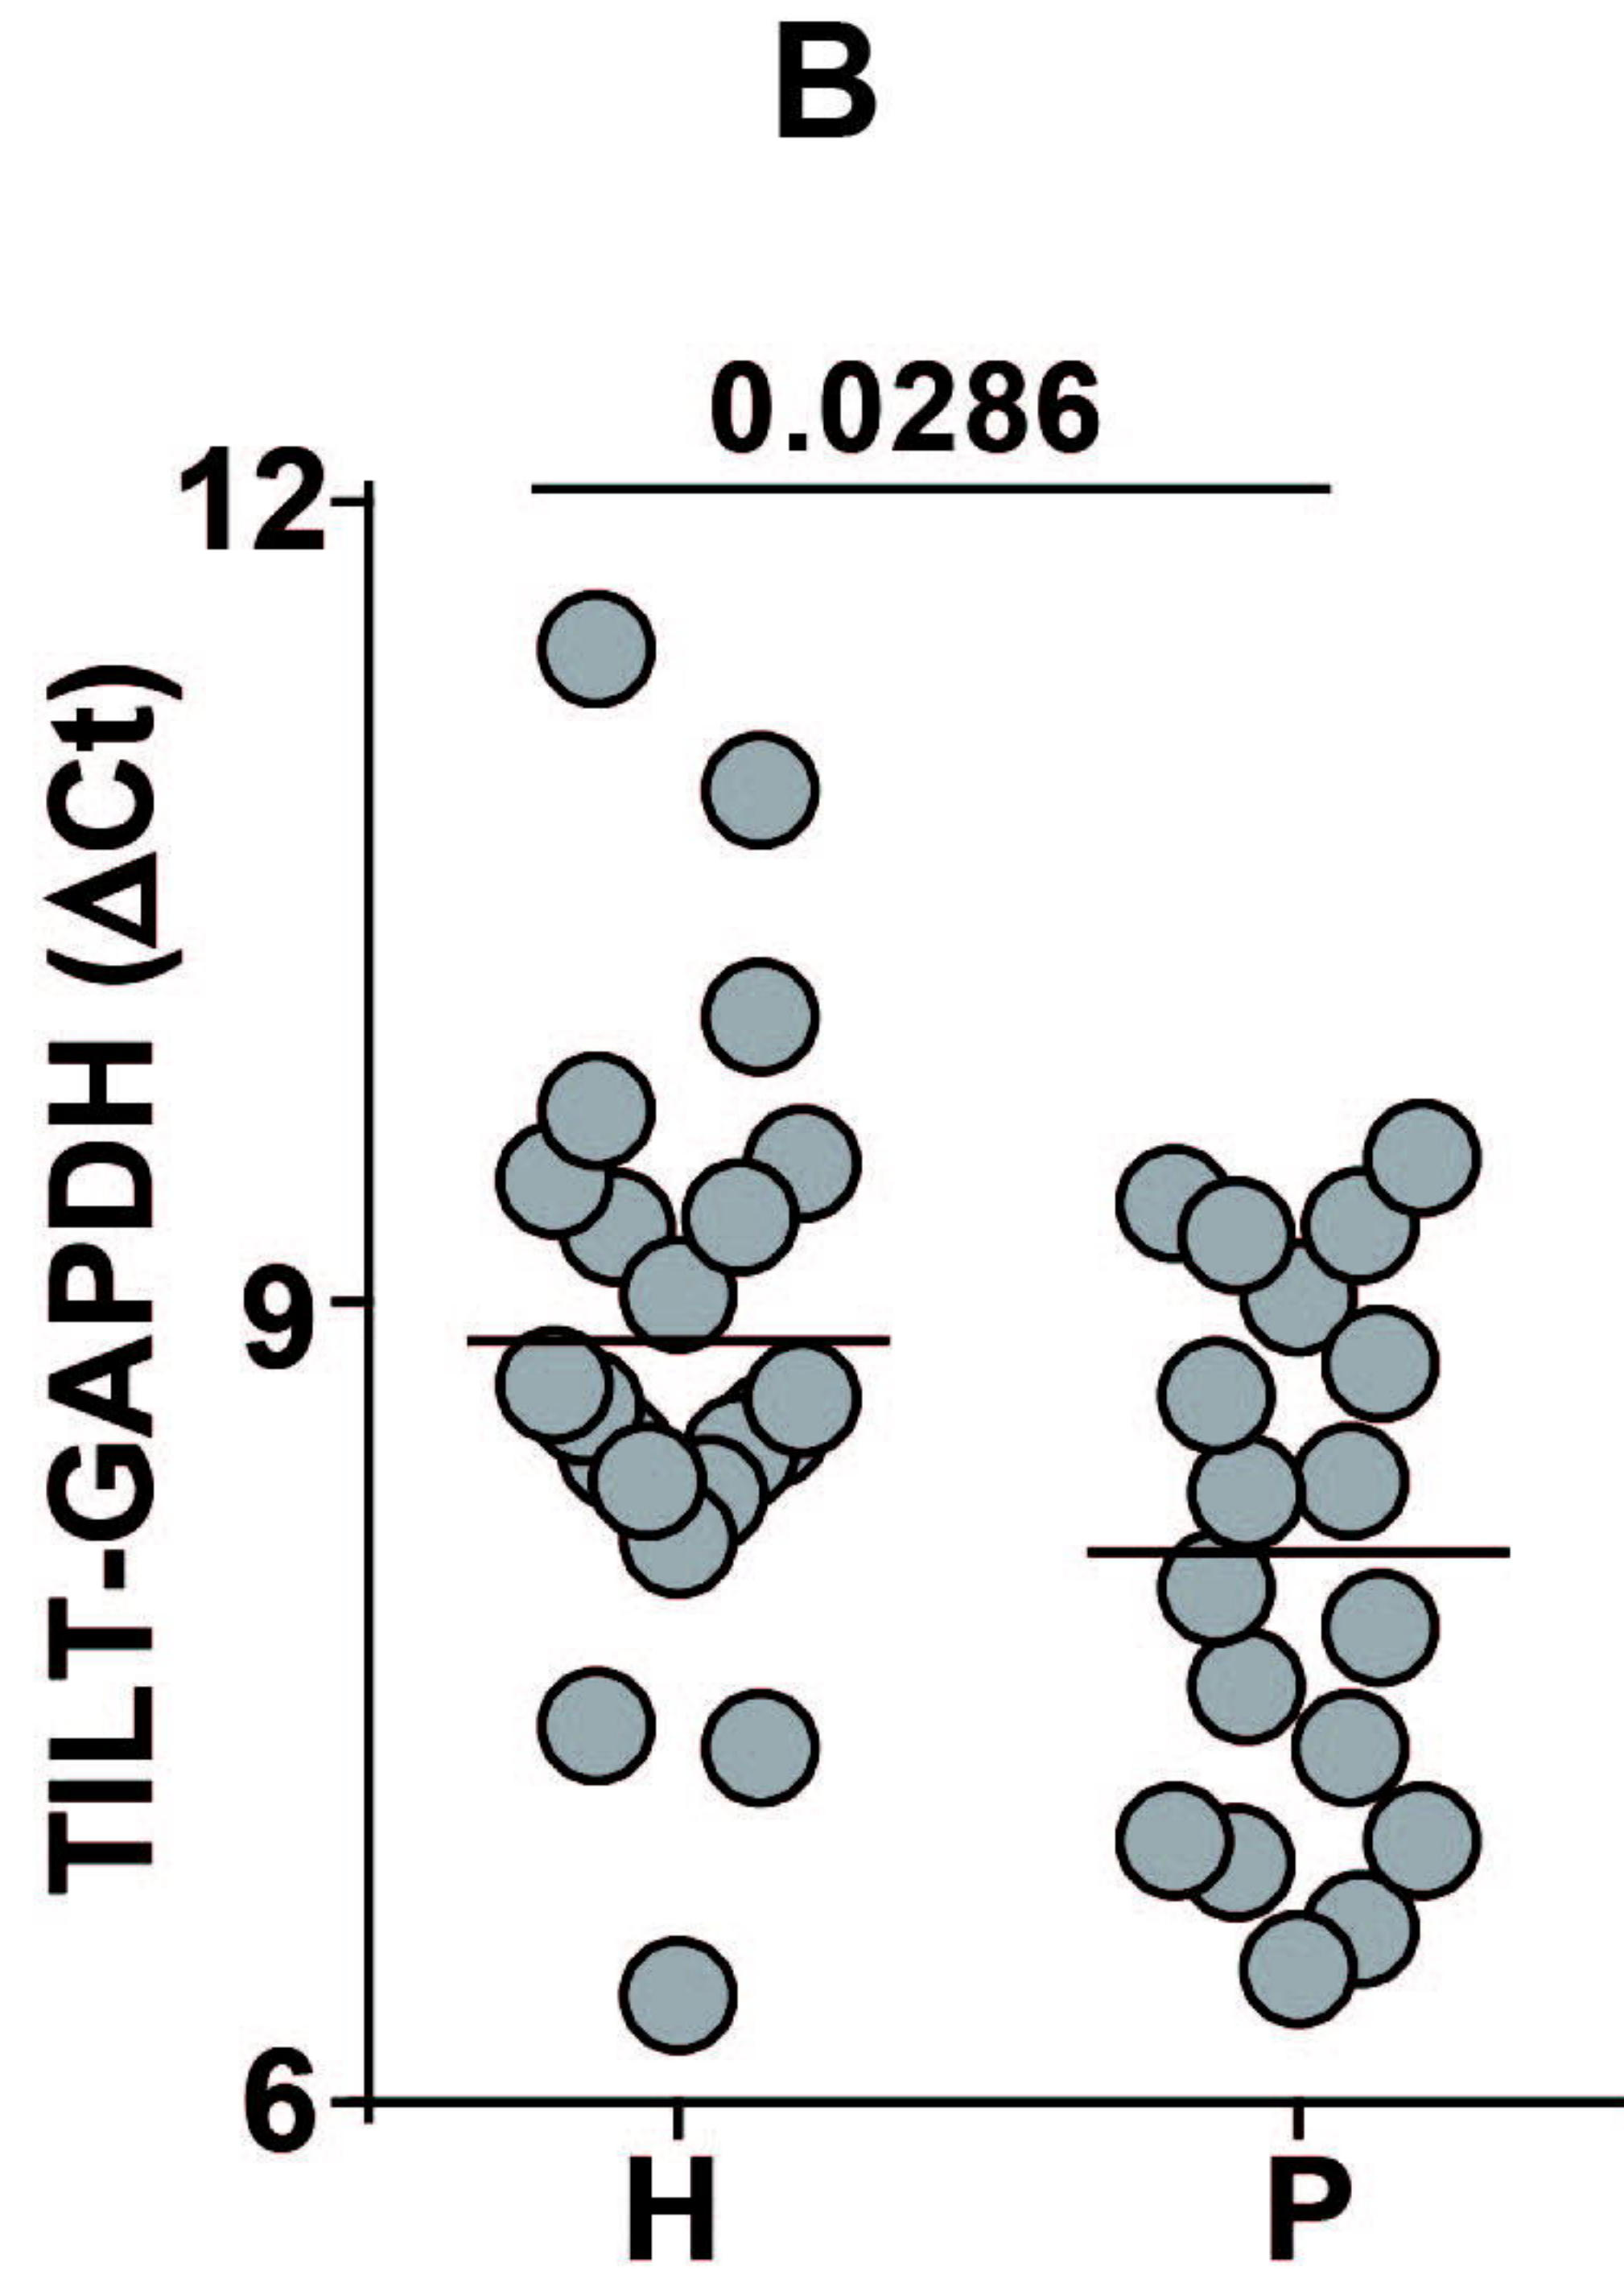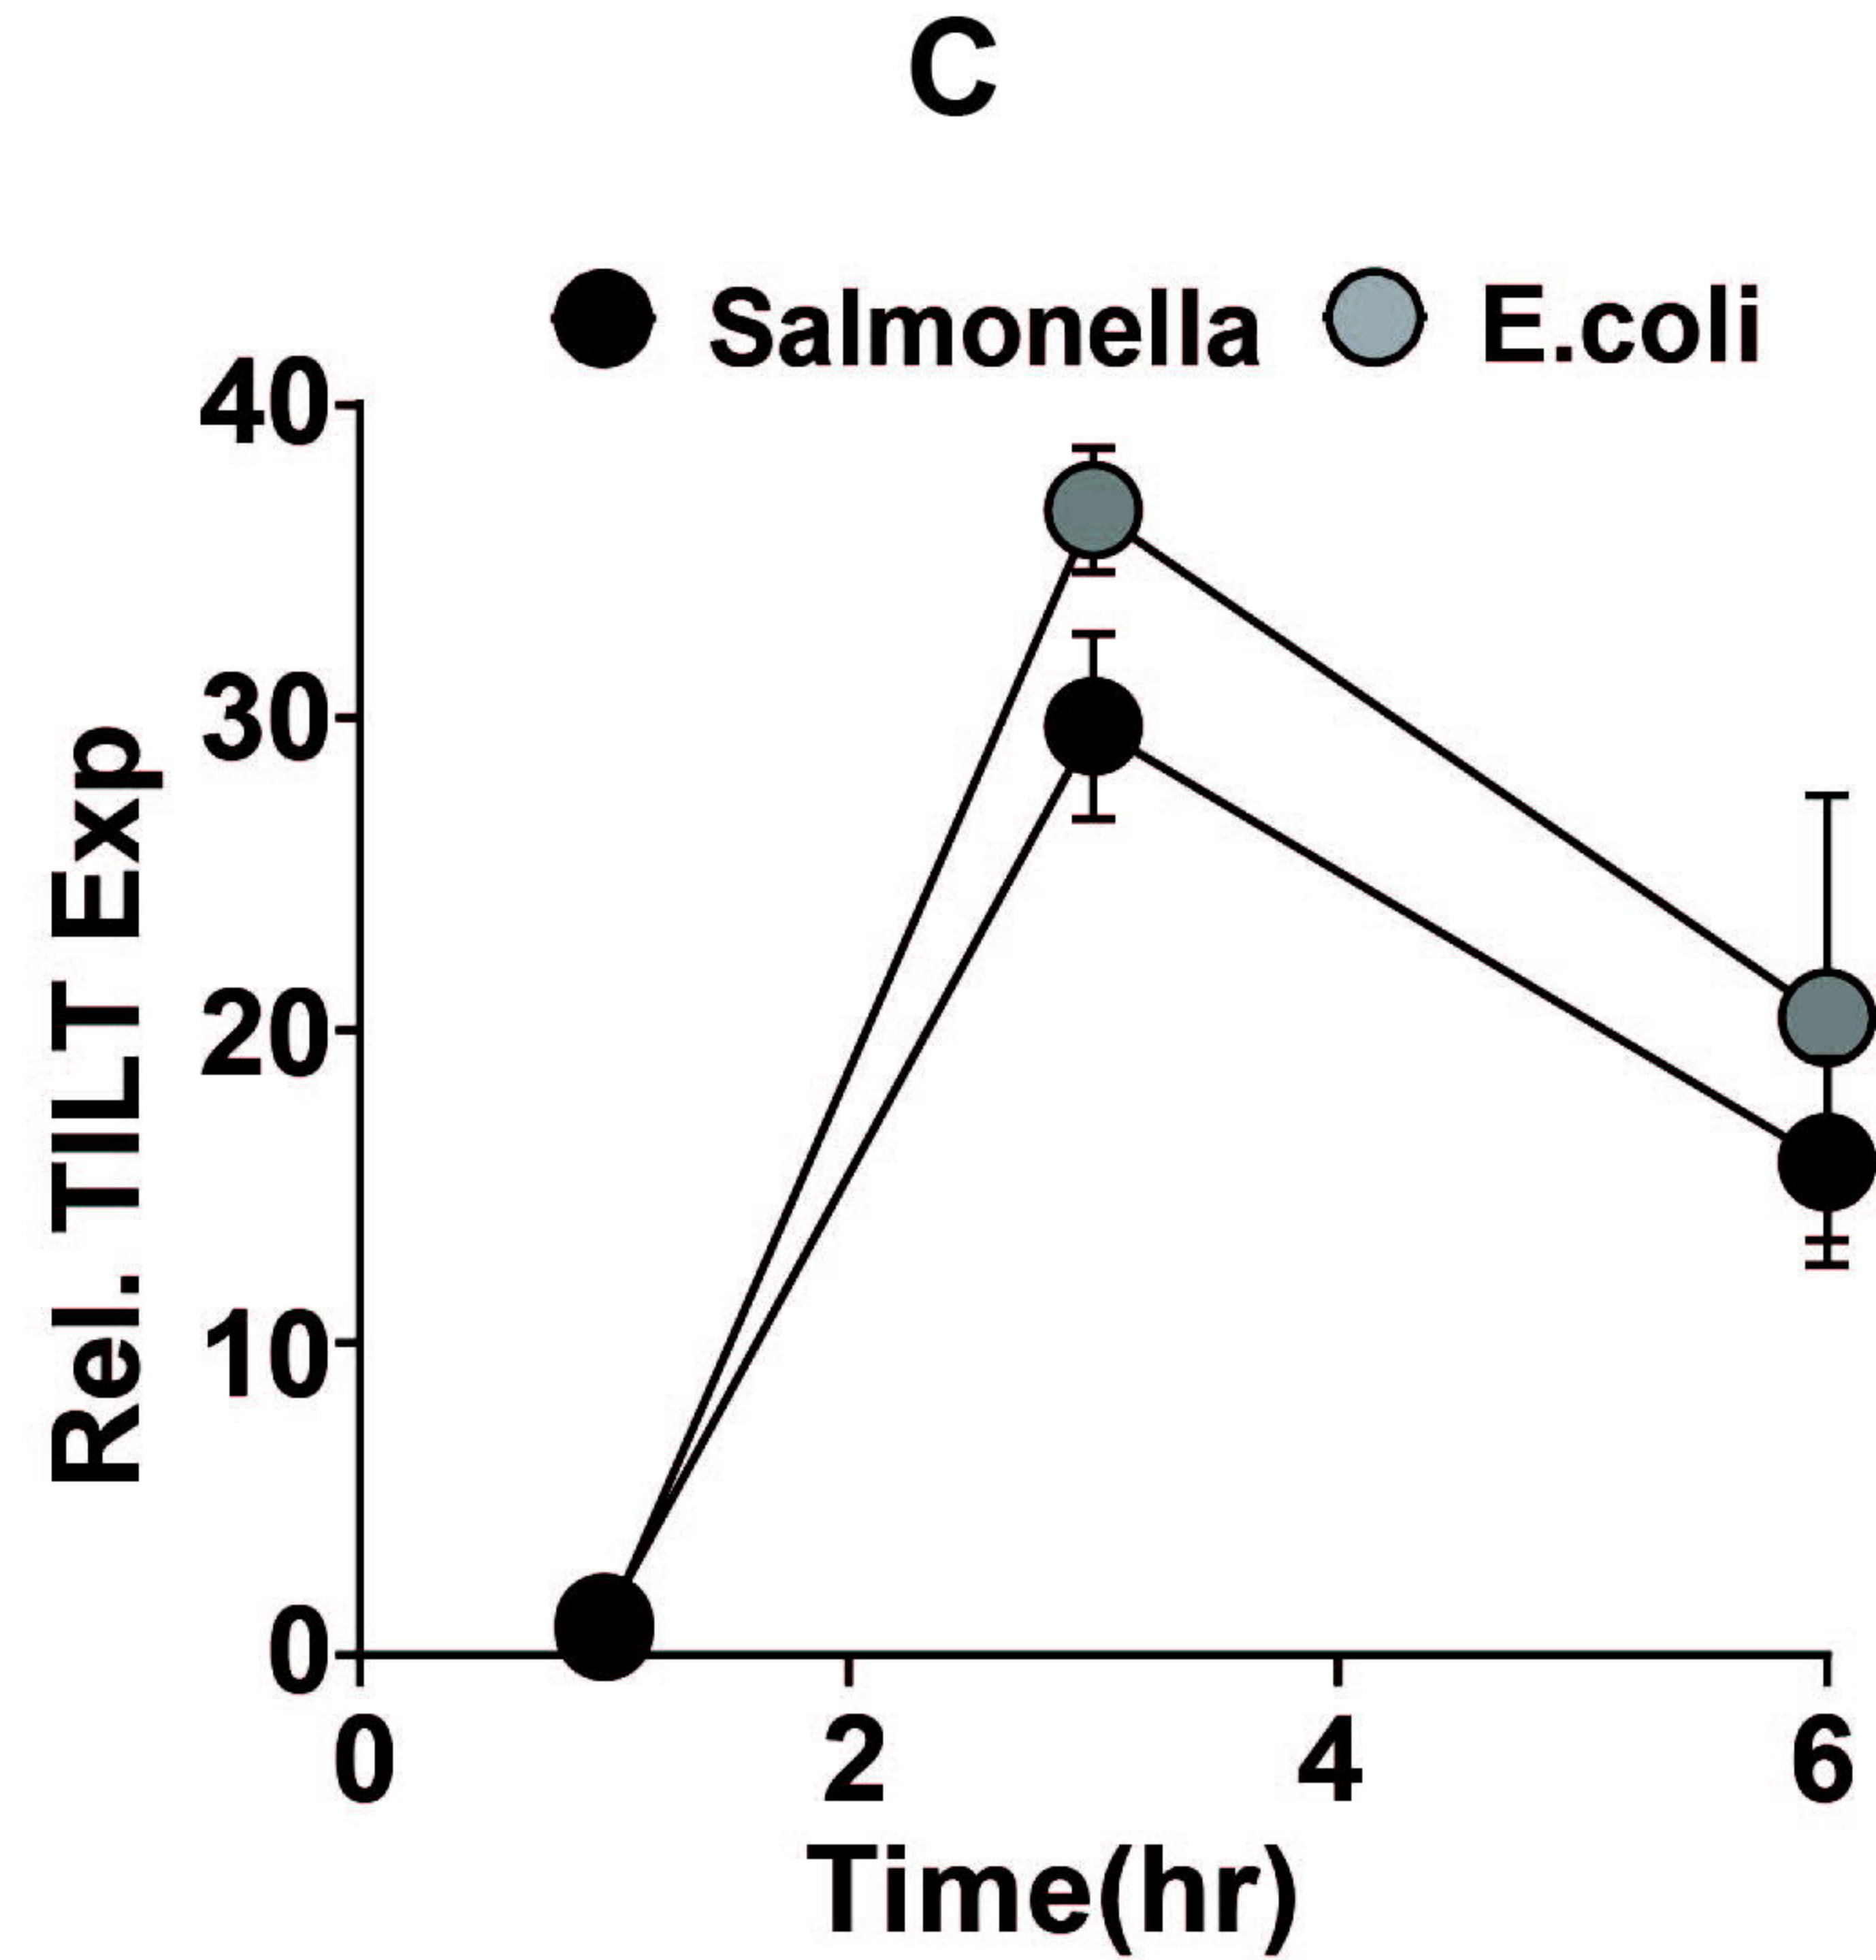

**Fig. 3**



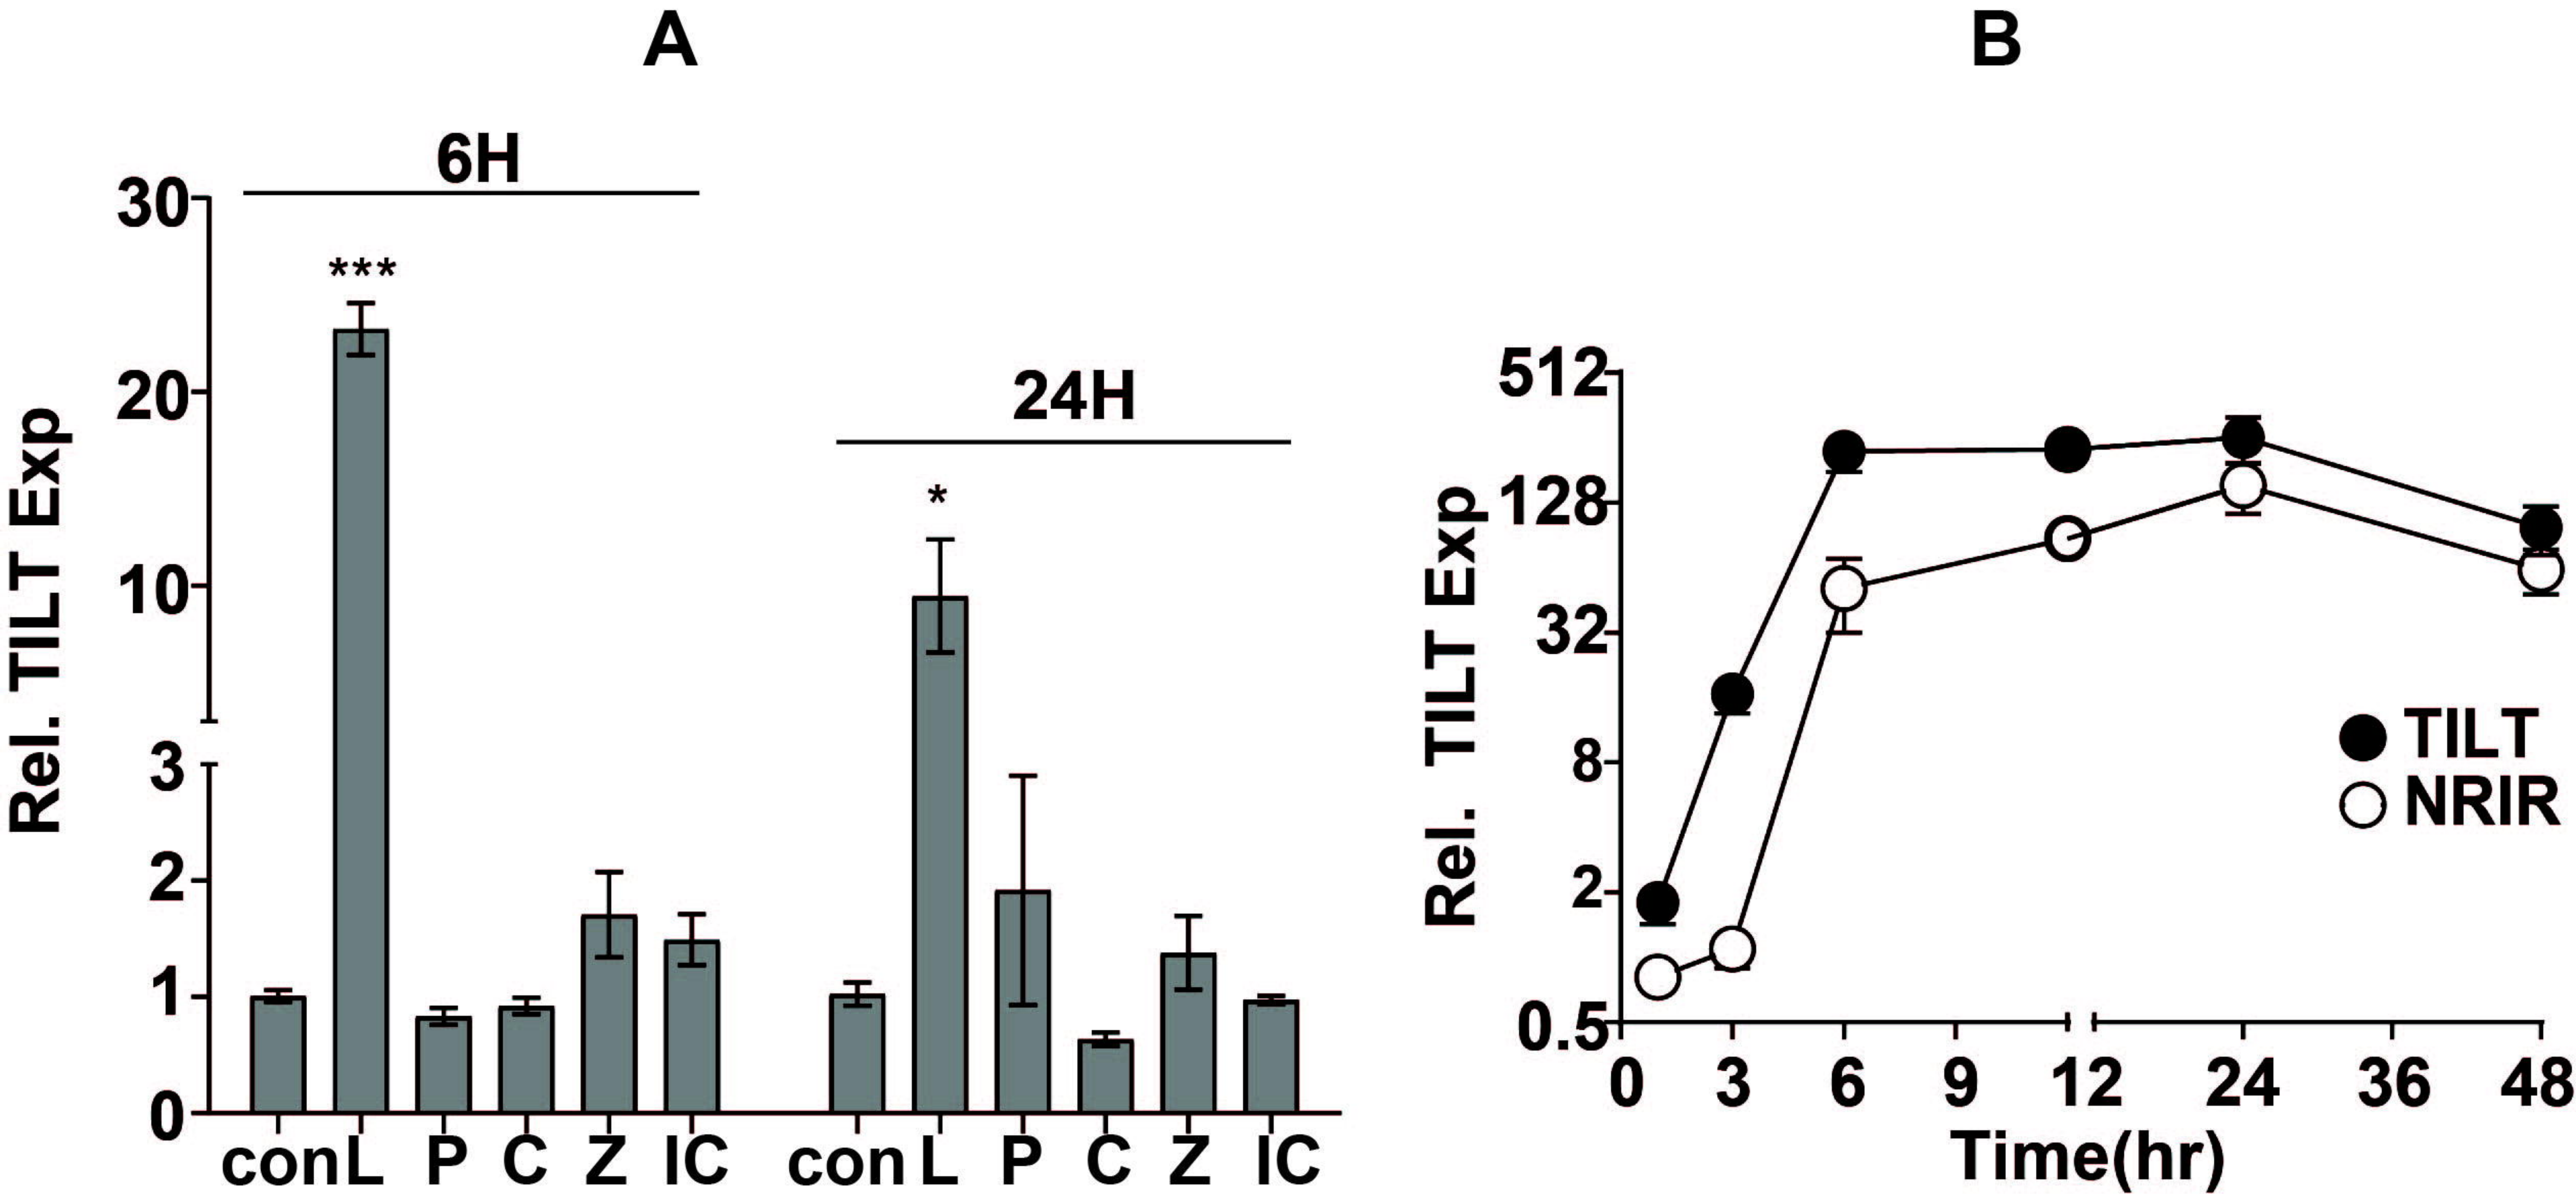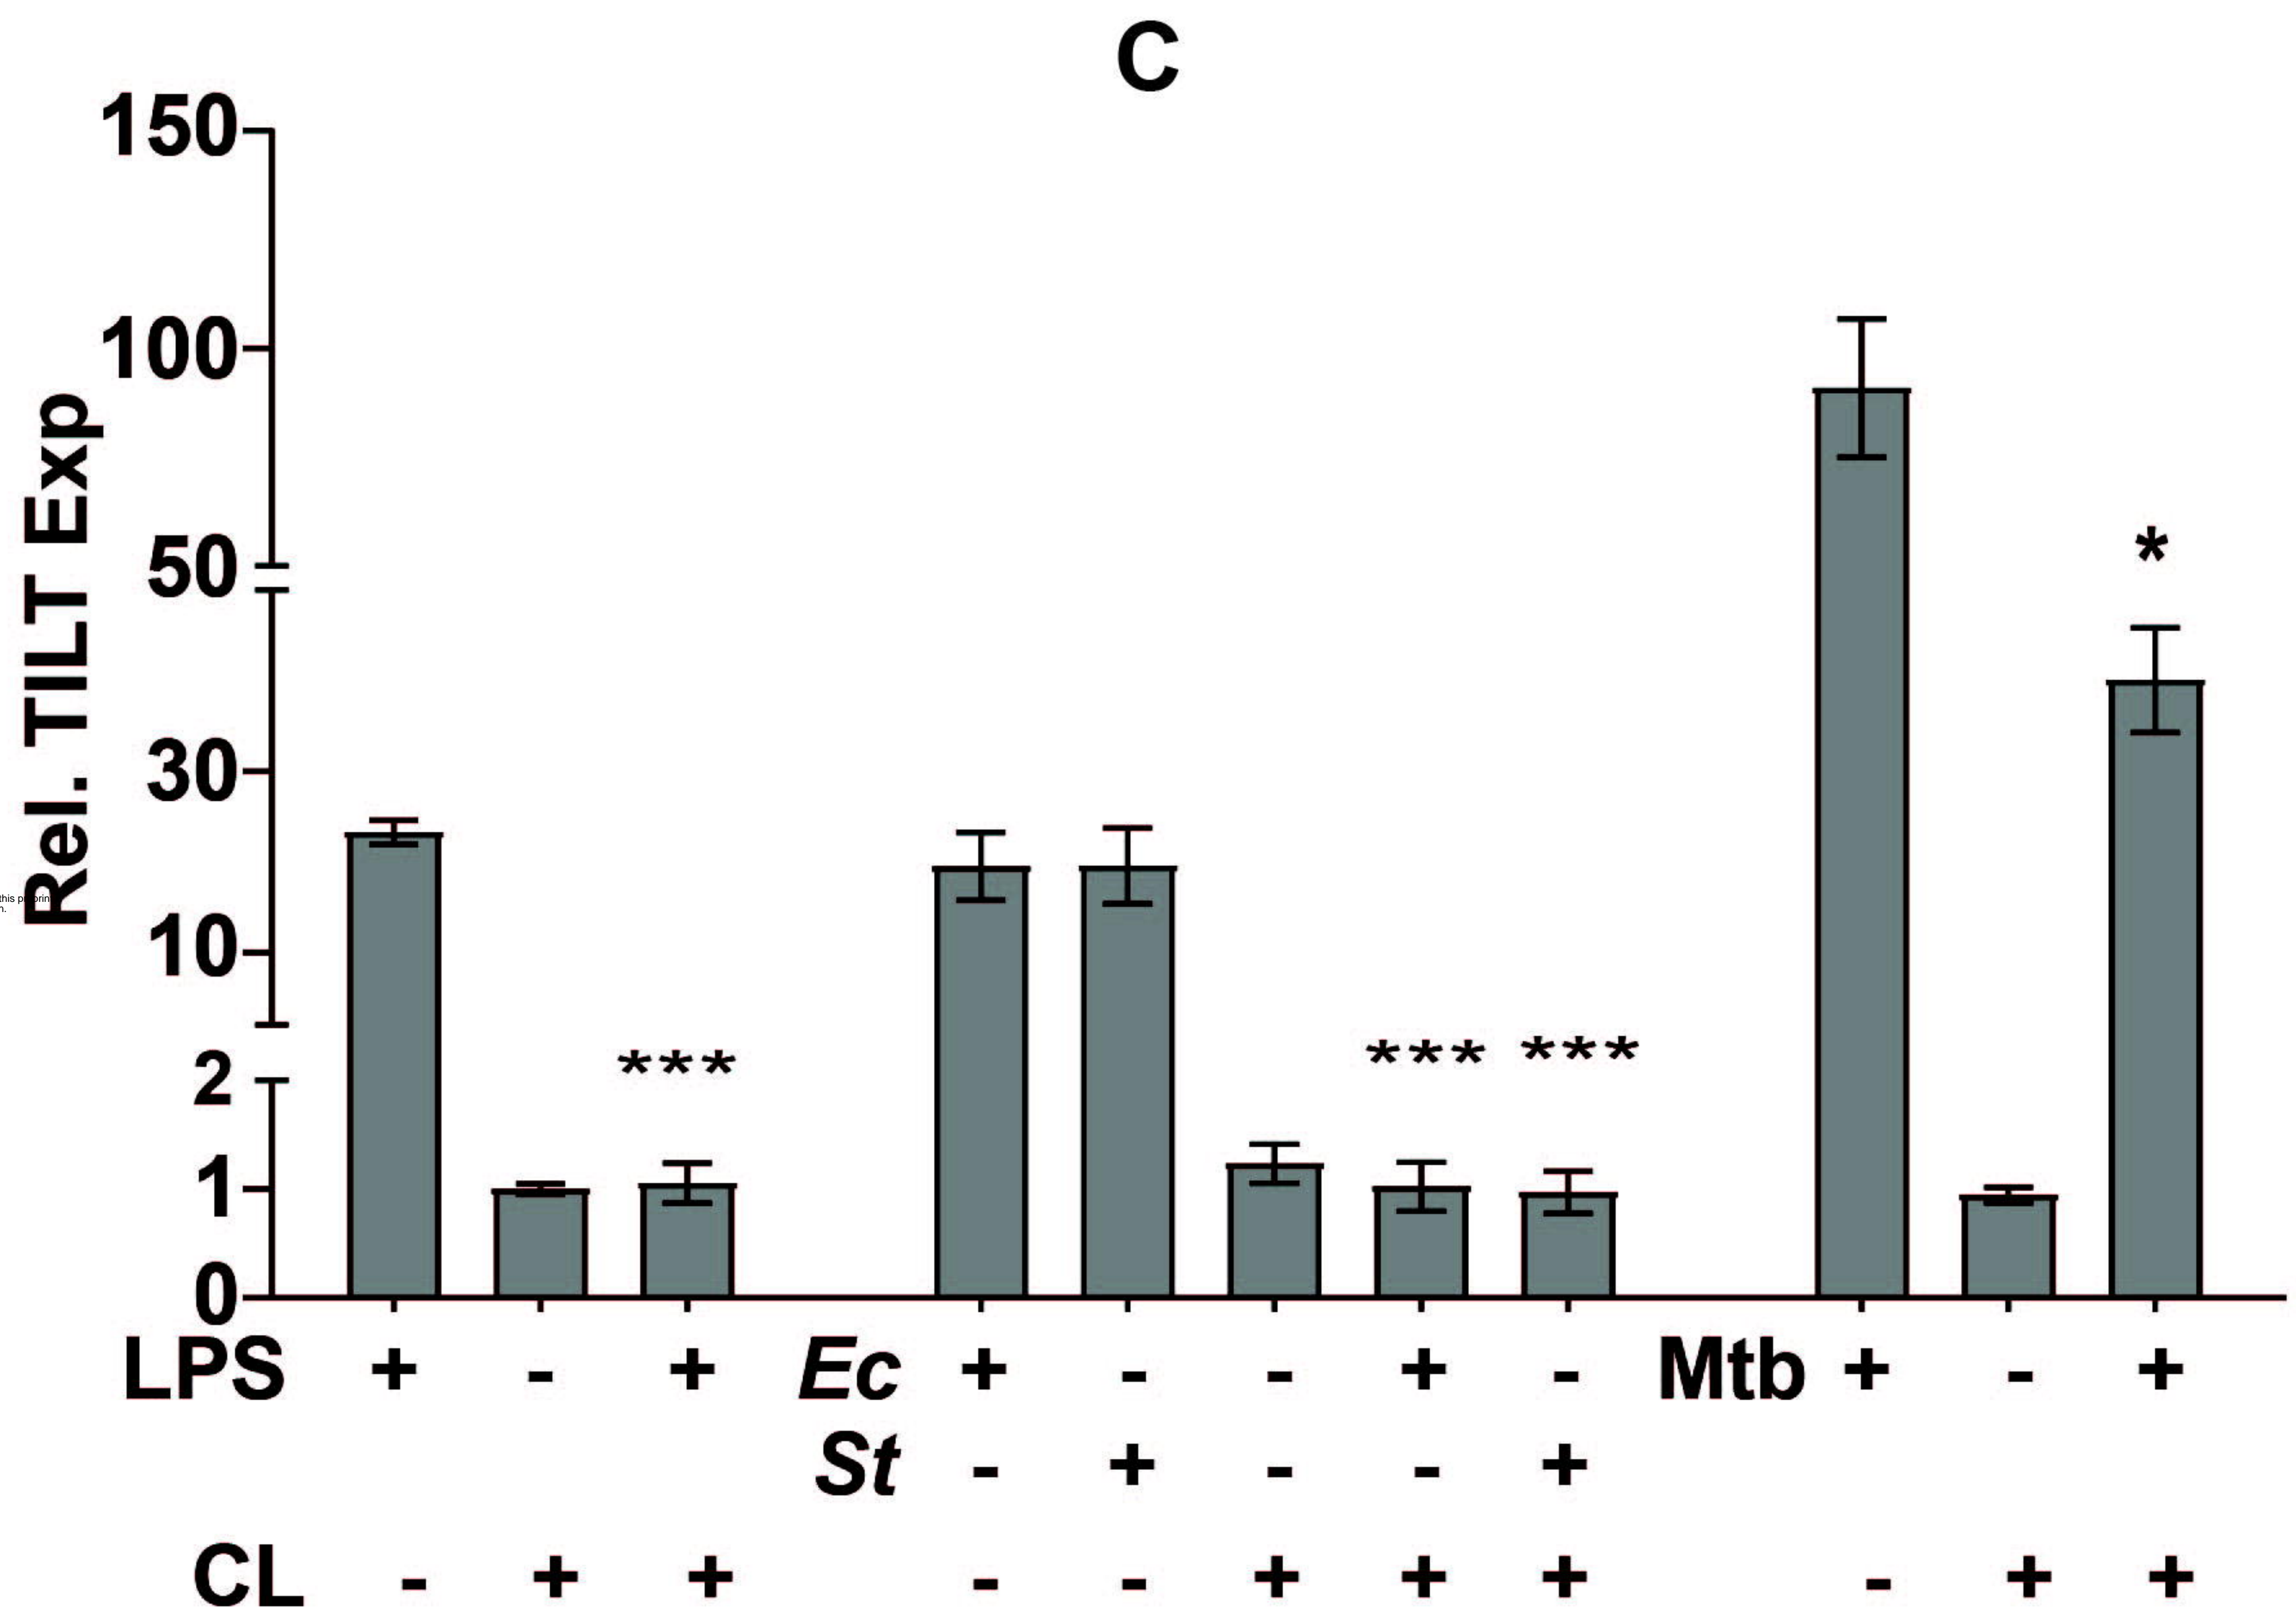

**Fig. 4**
